# Supplementary material for: The Evolutionary History and Ancestral Biogeographic Range Estimation of Old-world Rhinolophidae and Hipposideridae (Chiroptera)
Source: Research Square preprint supplement (doi:10.21203/rs.3.rs-1536867/v1), 2022-05-04

## **Supplementary Figure S1**


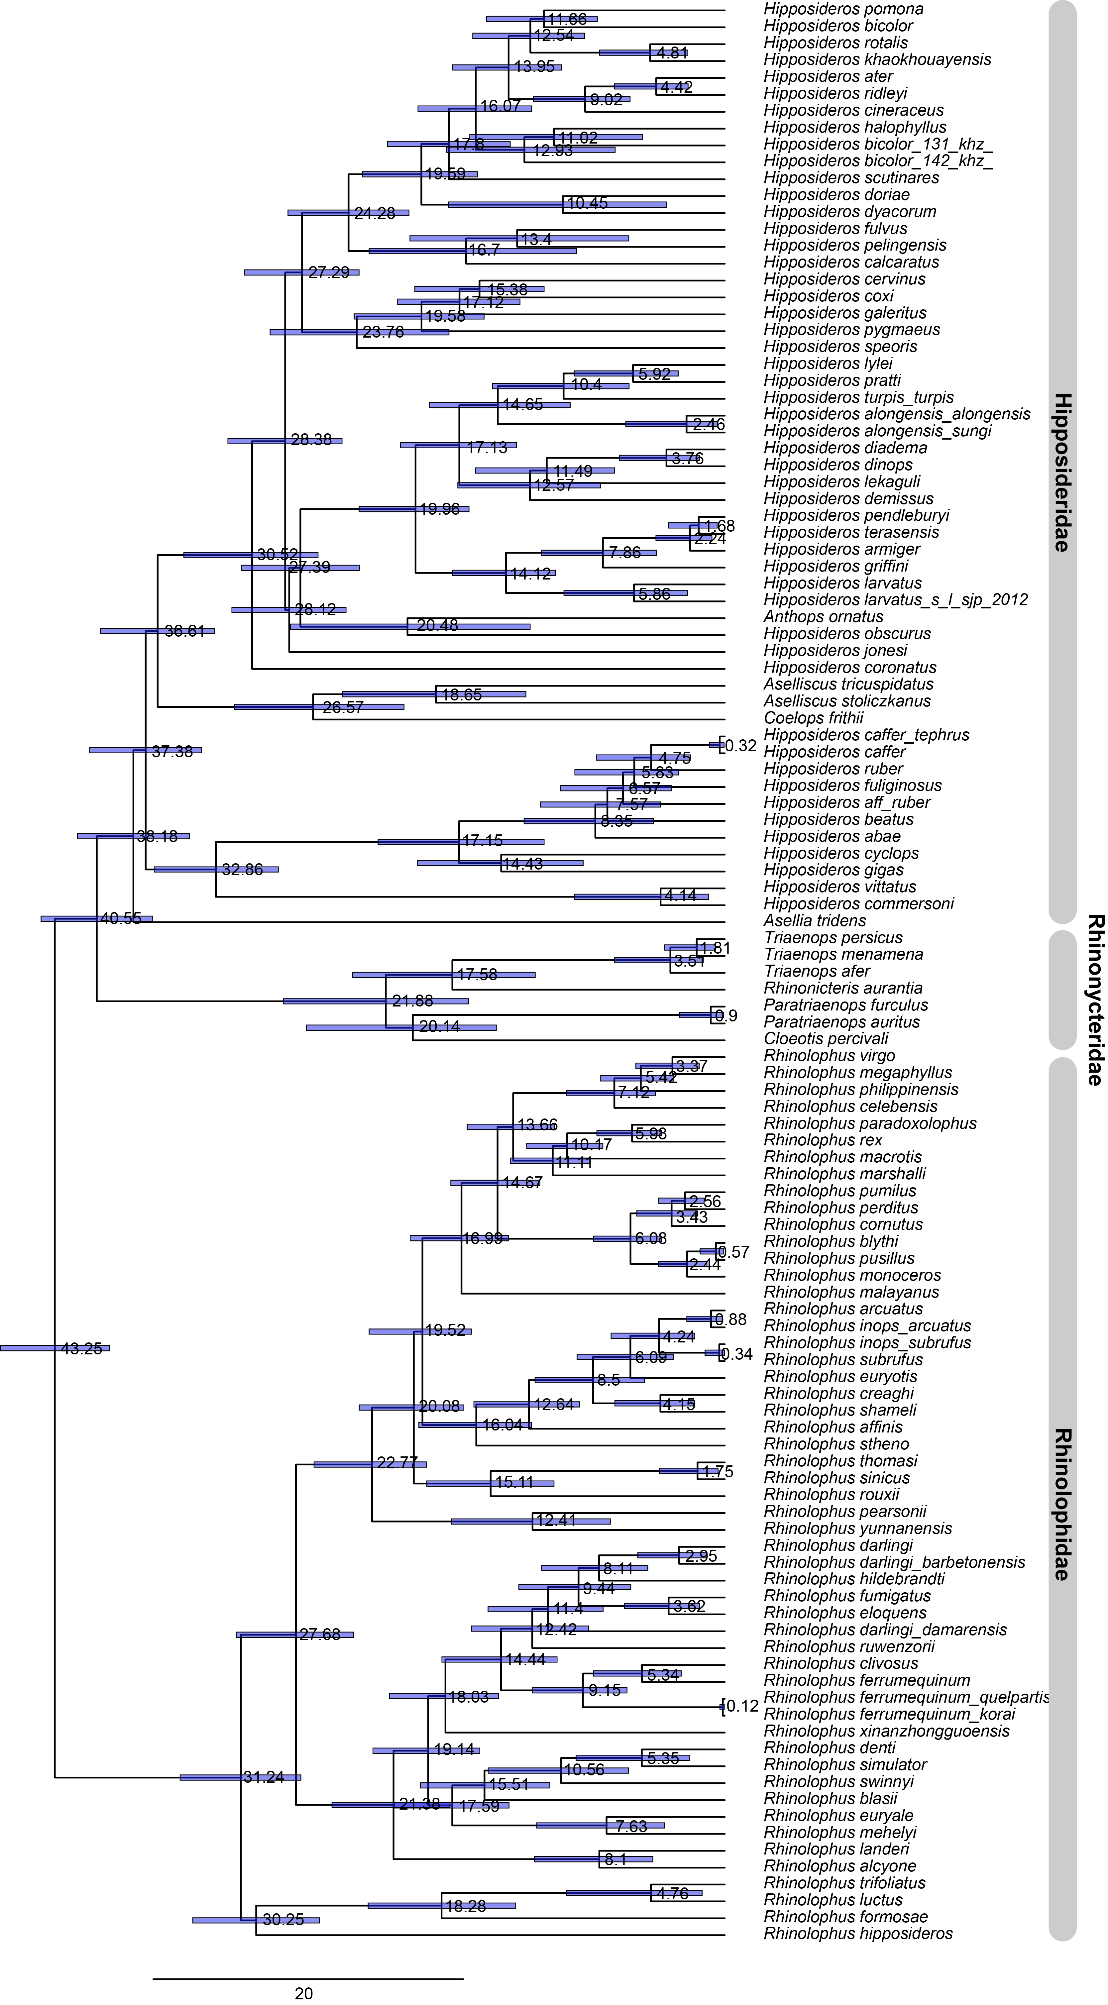


## **Supplementary Figure S2**
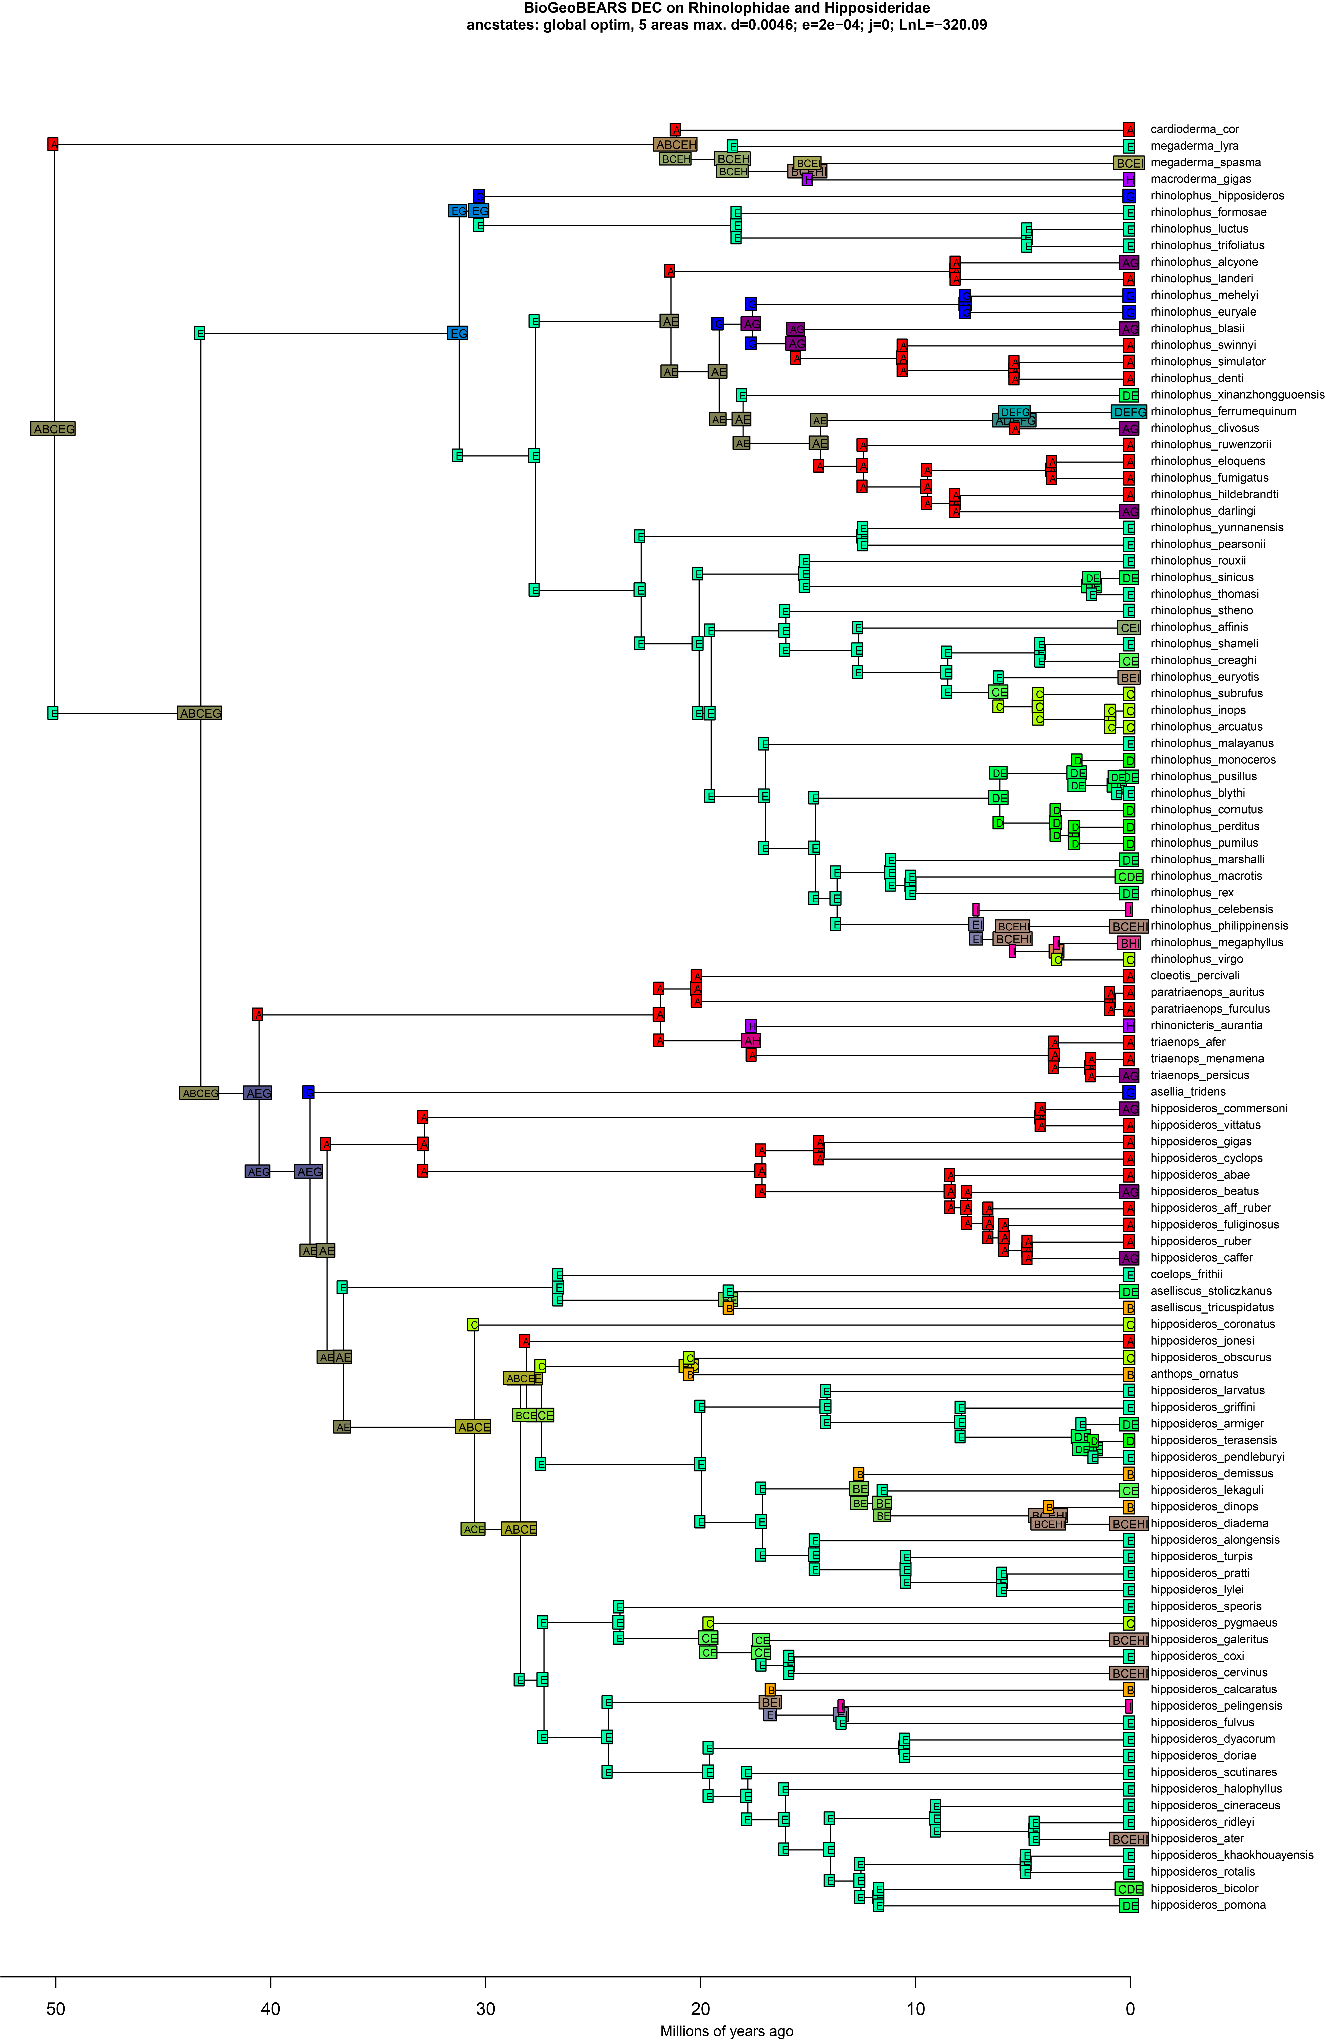


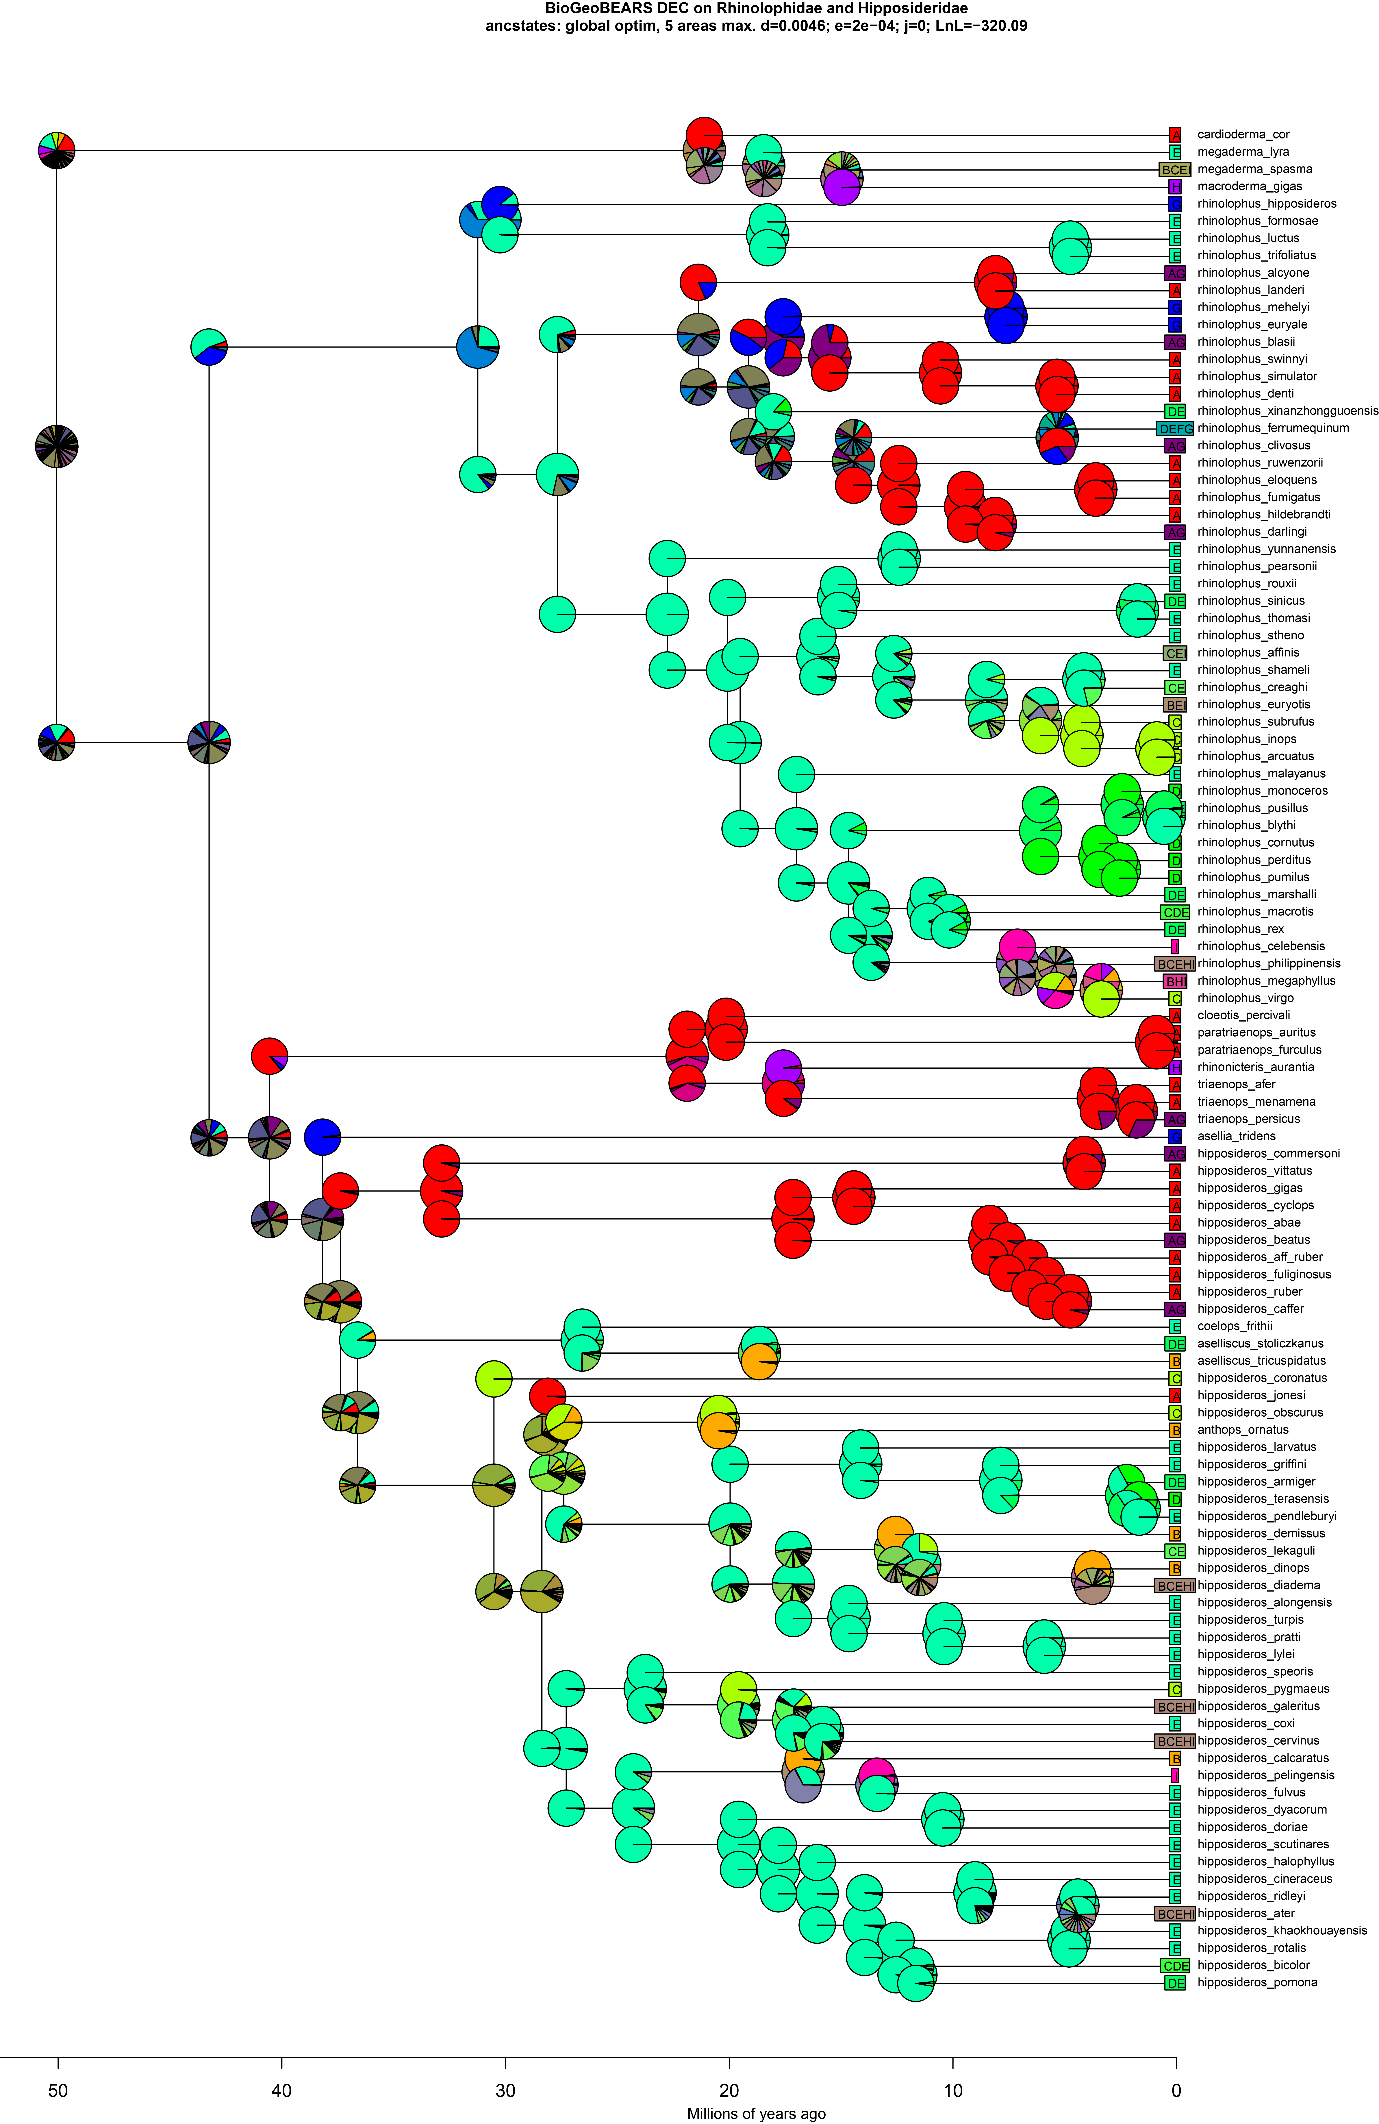


## Supplementary **Figure S3**


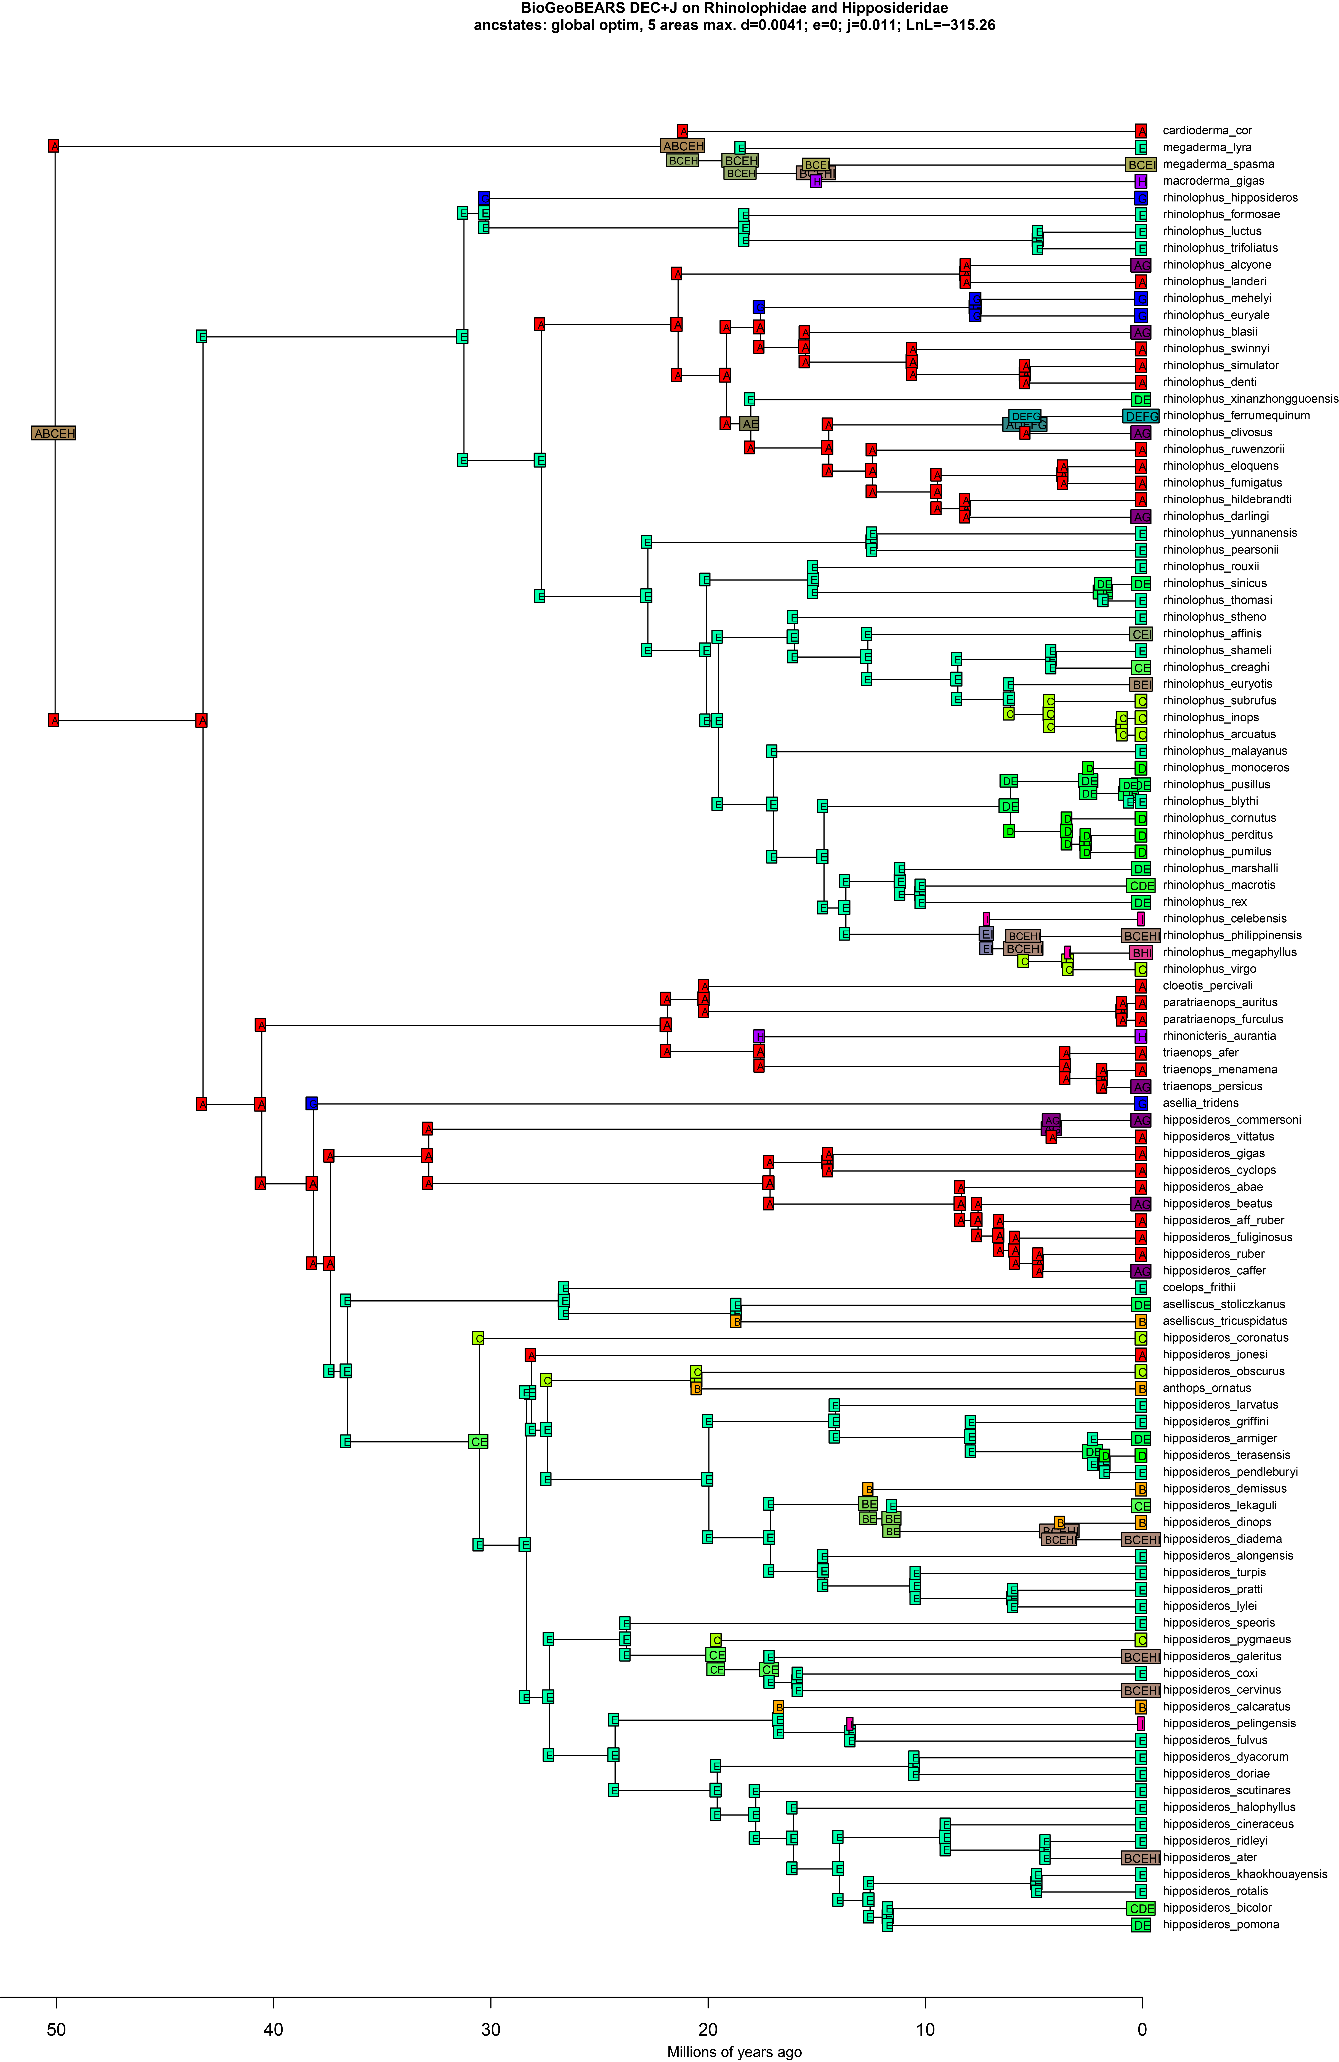


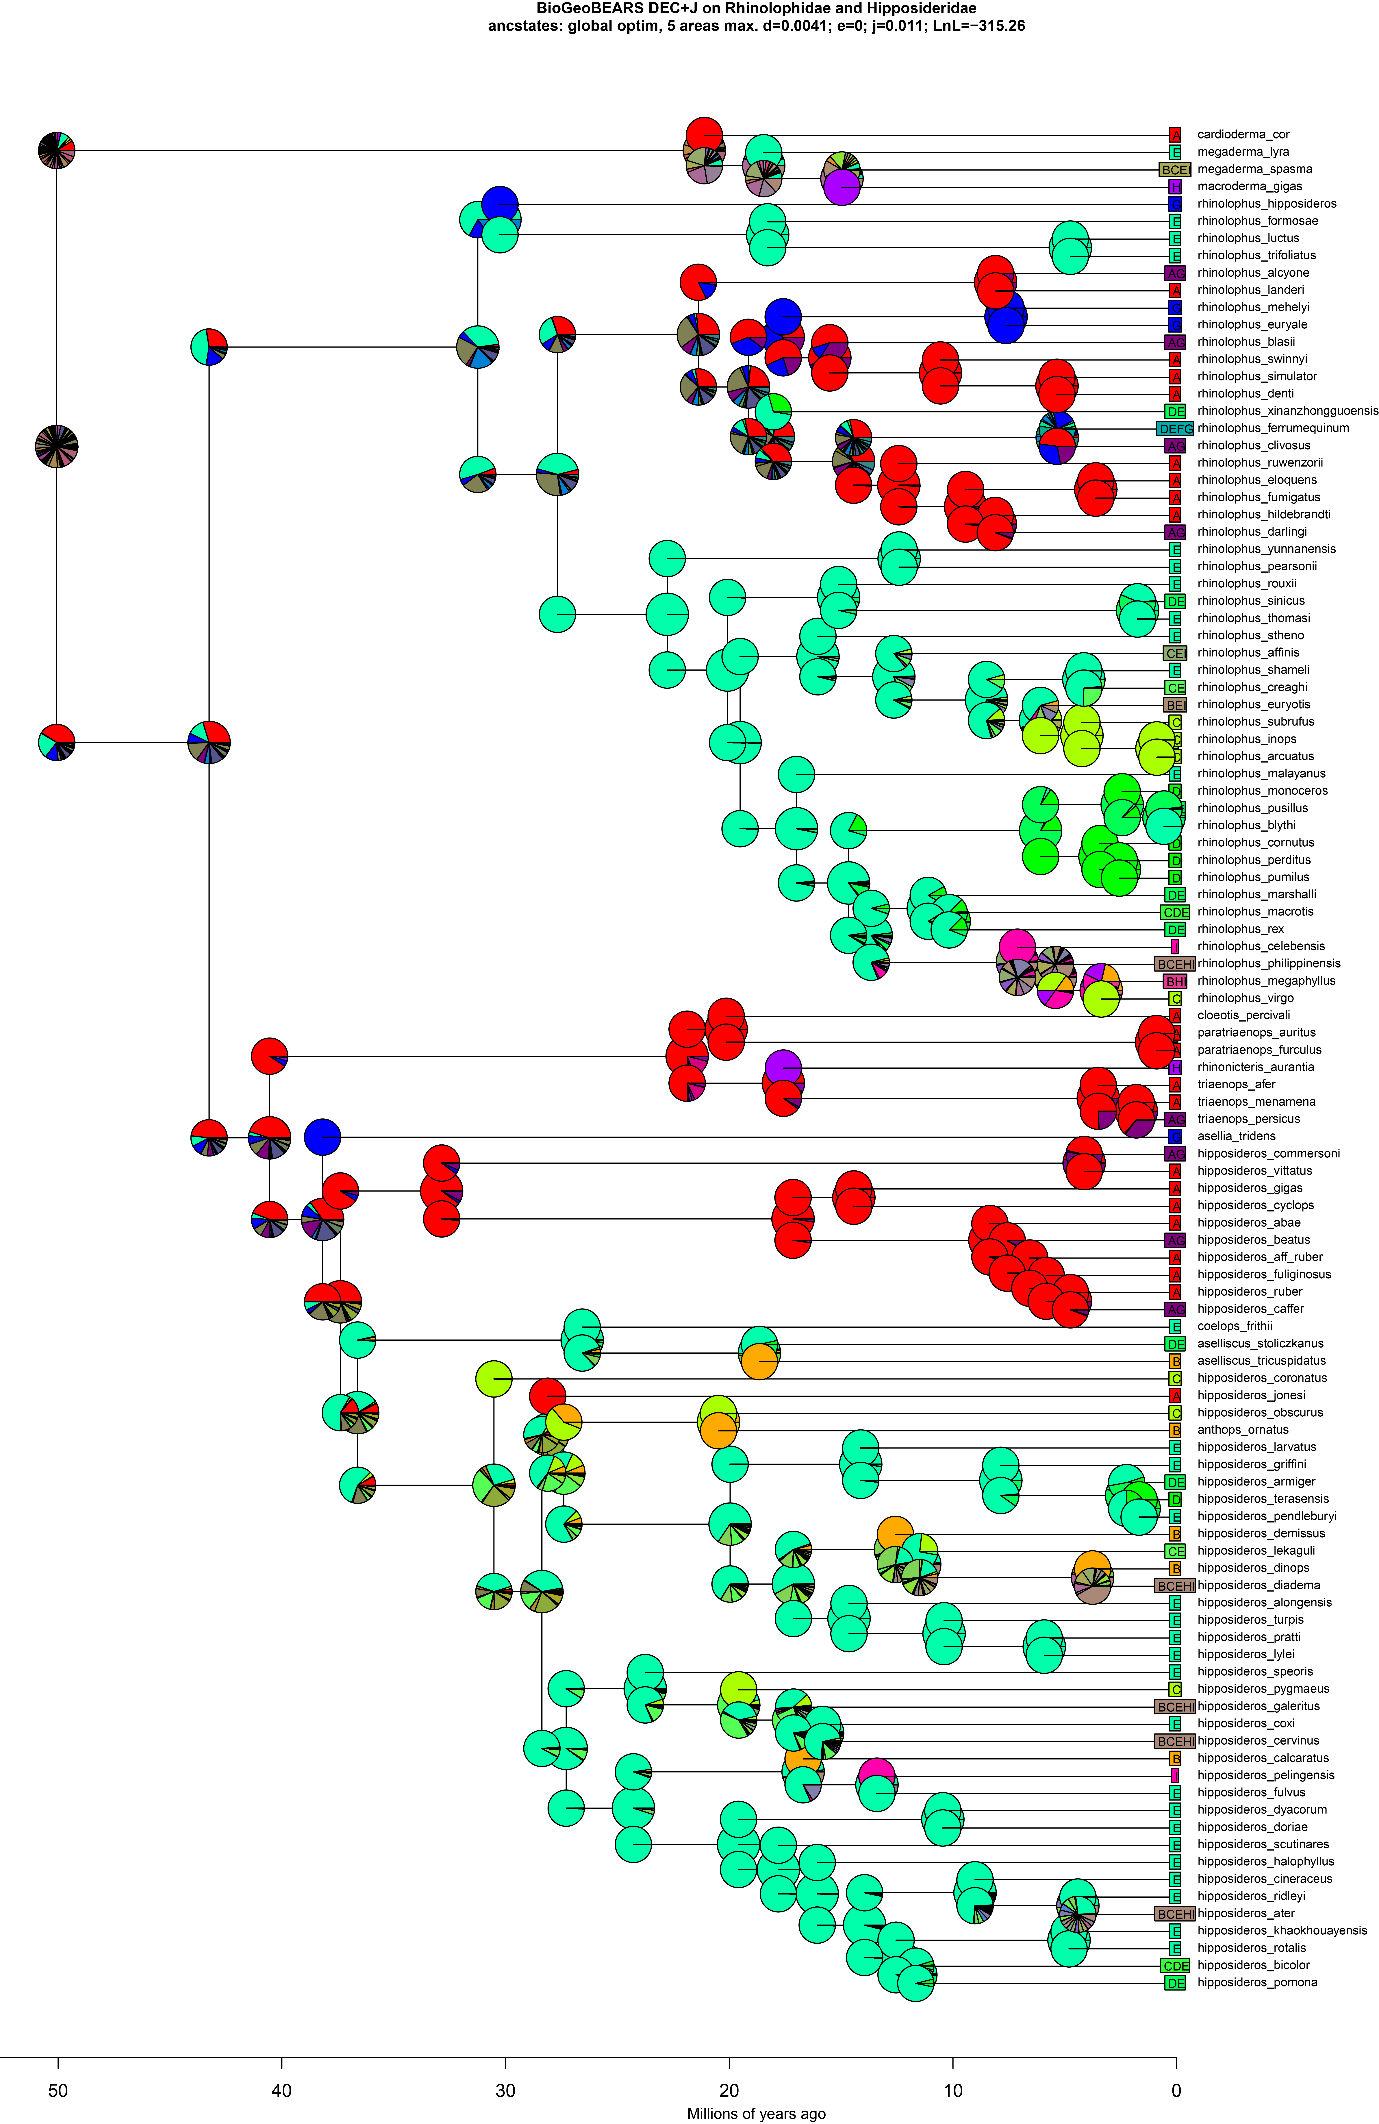


## **Supplementary Figure S4**


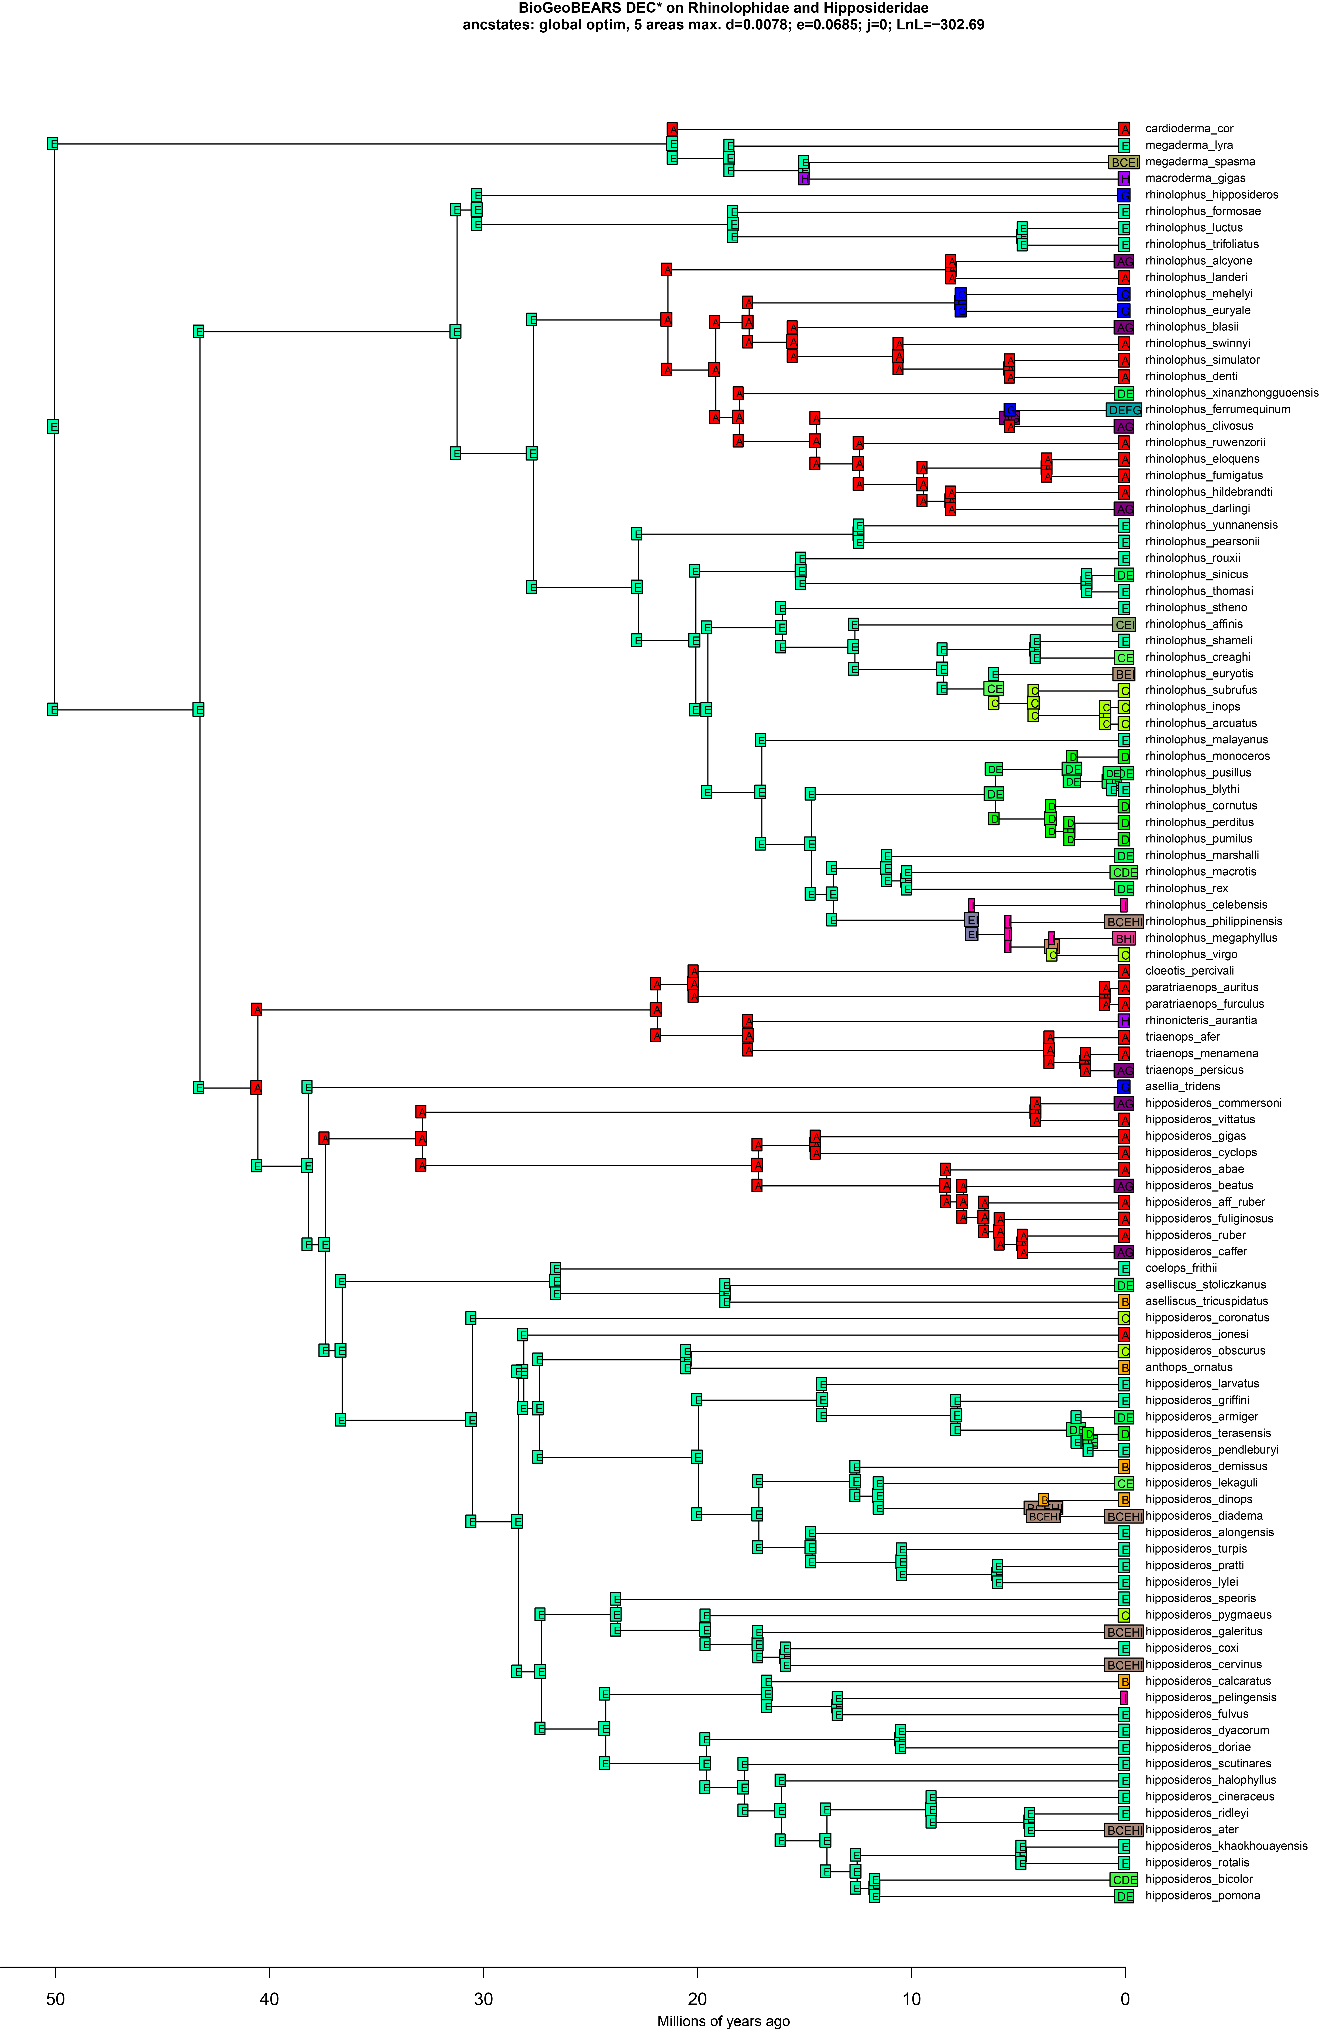


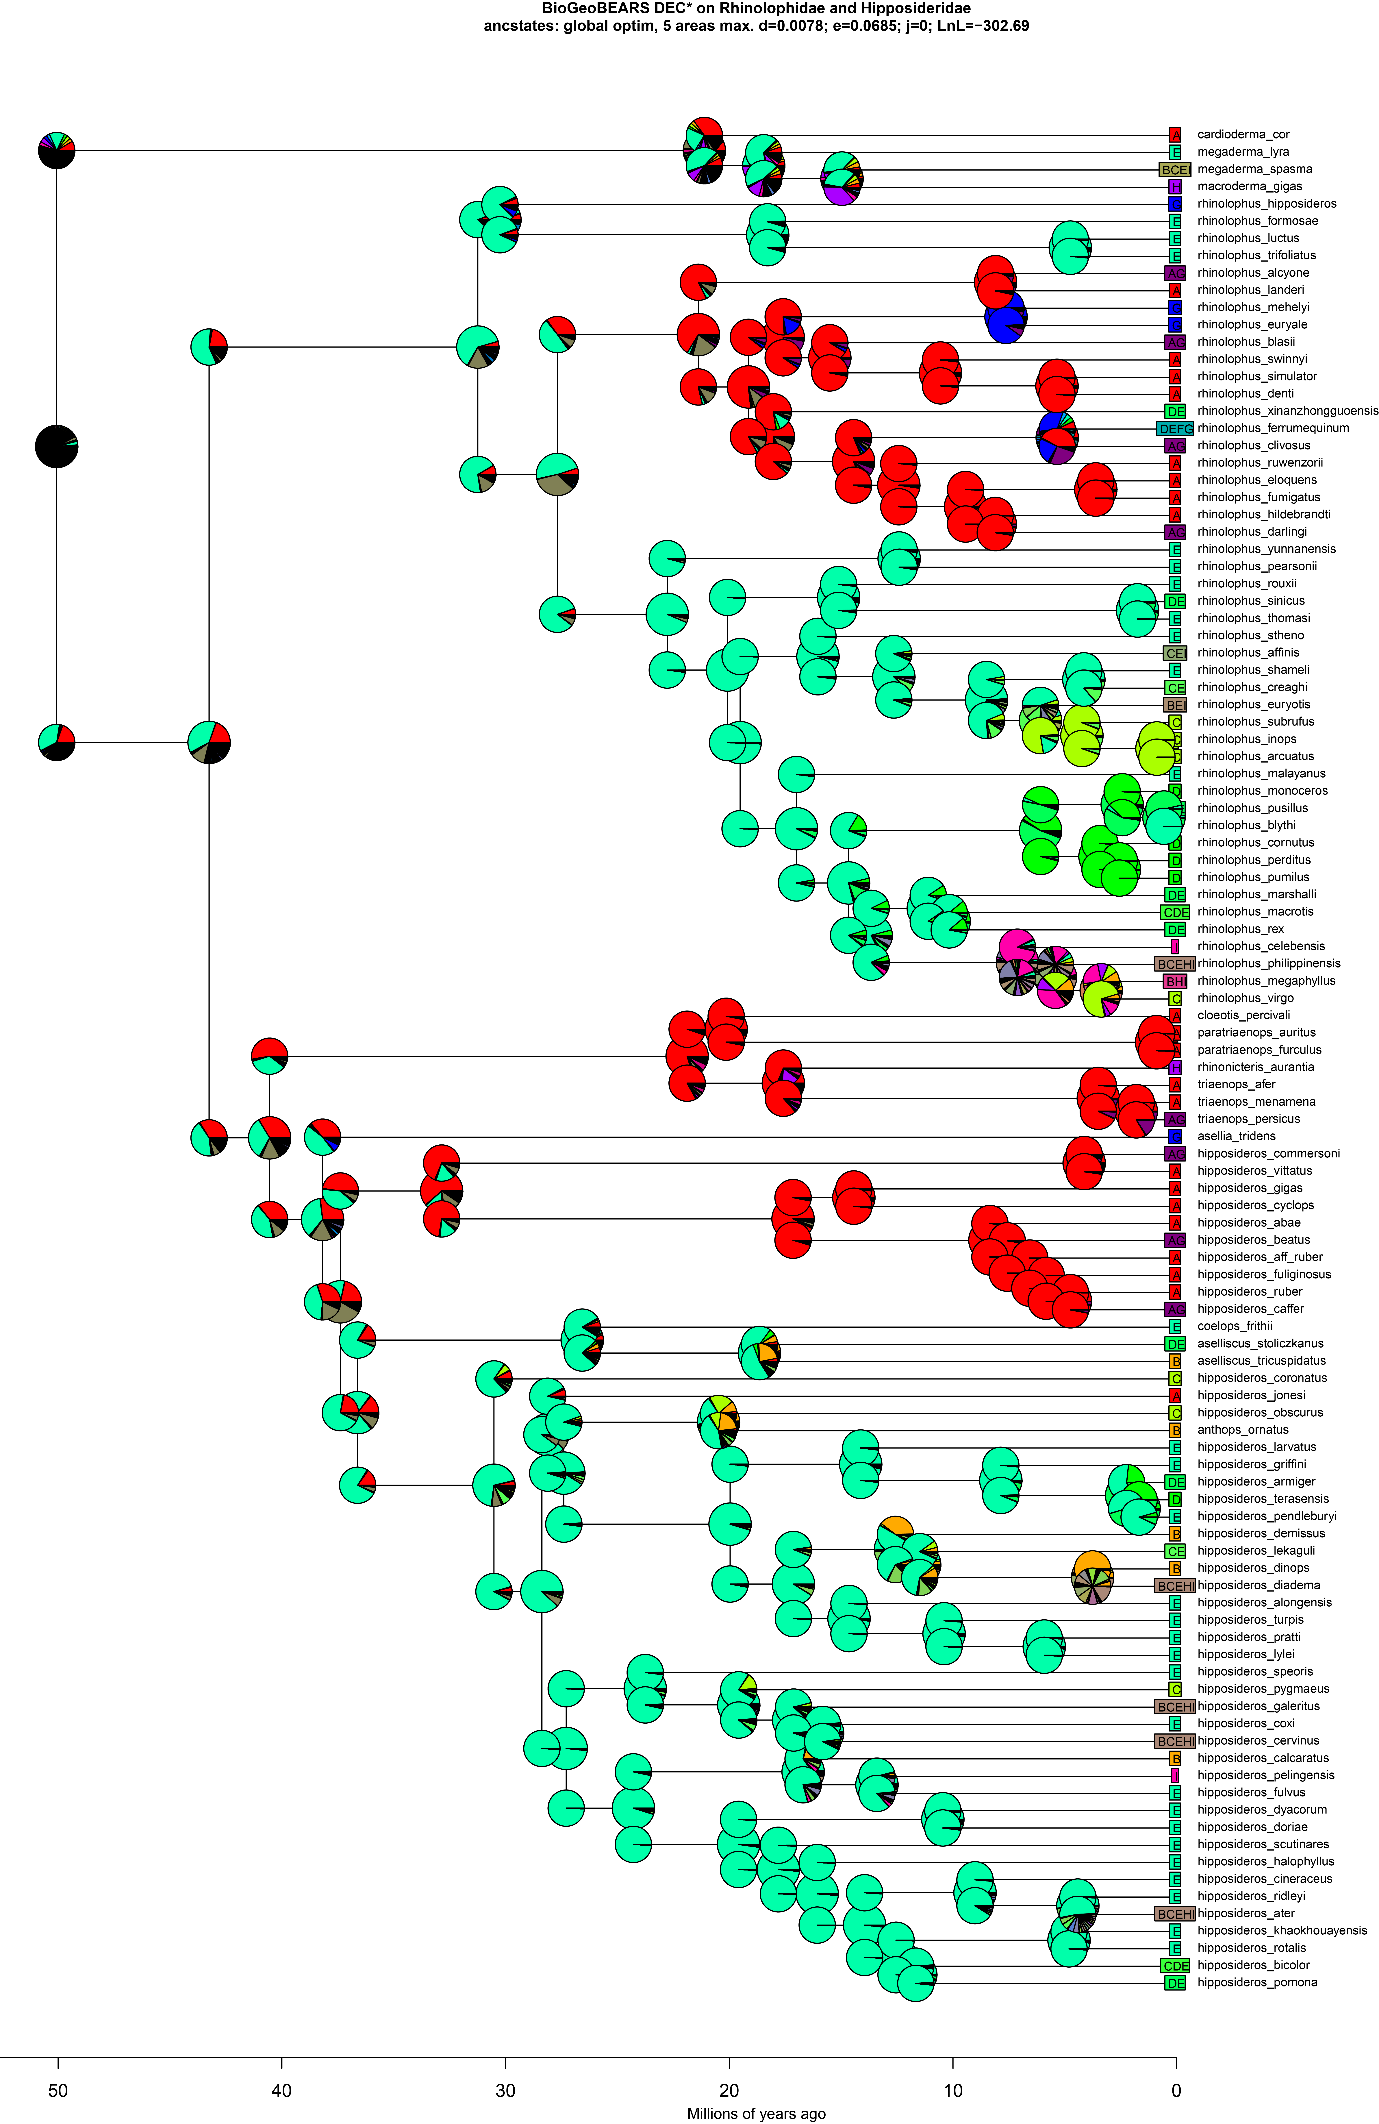


## **Supplementary Figure S5**


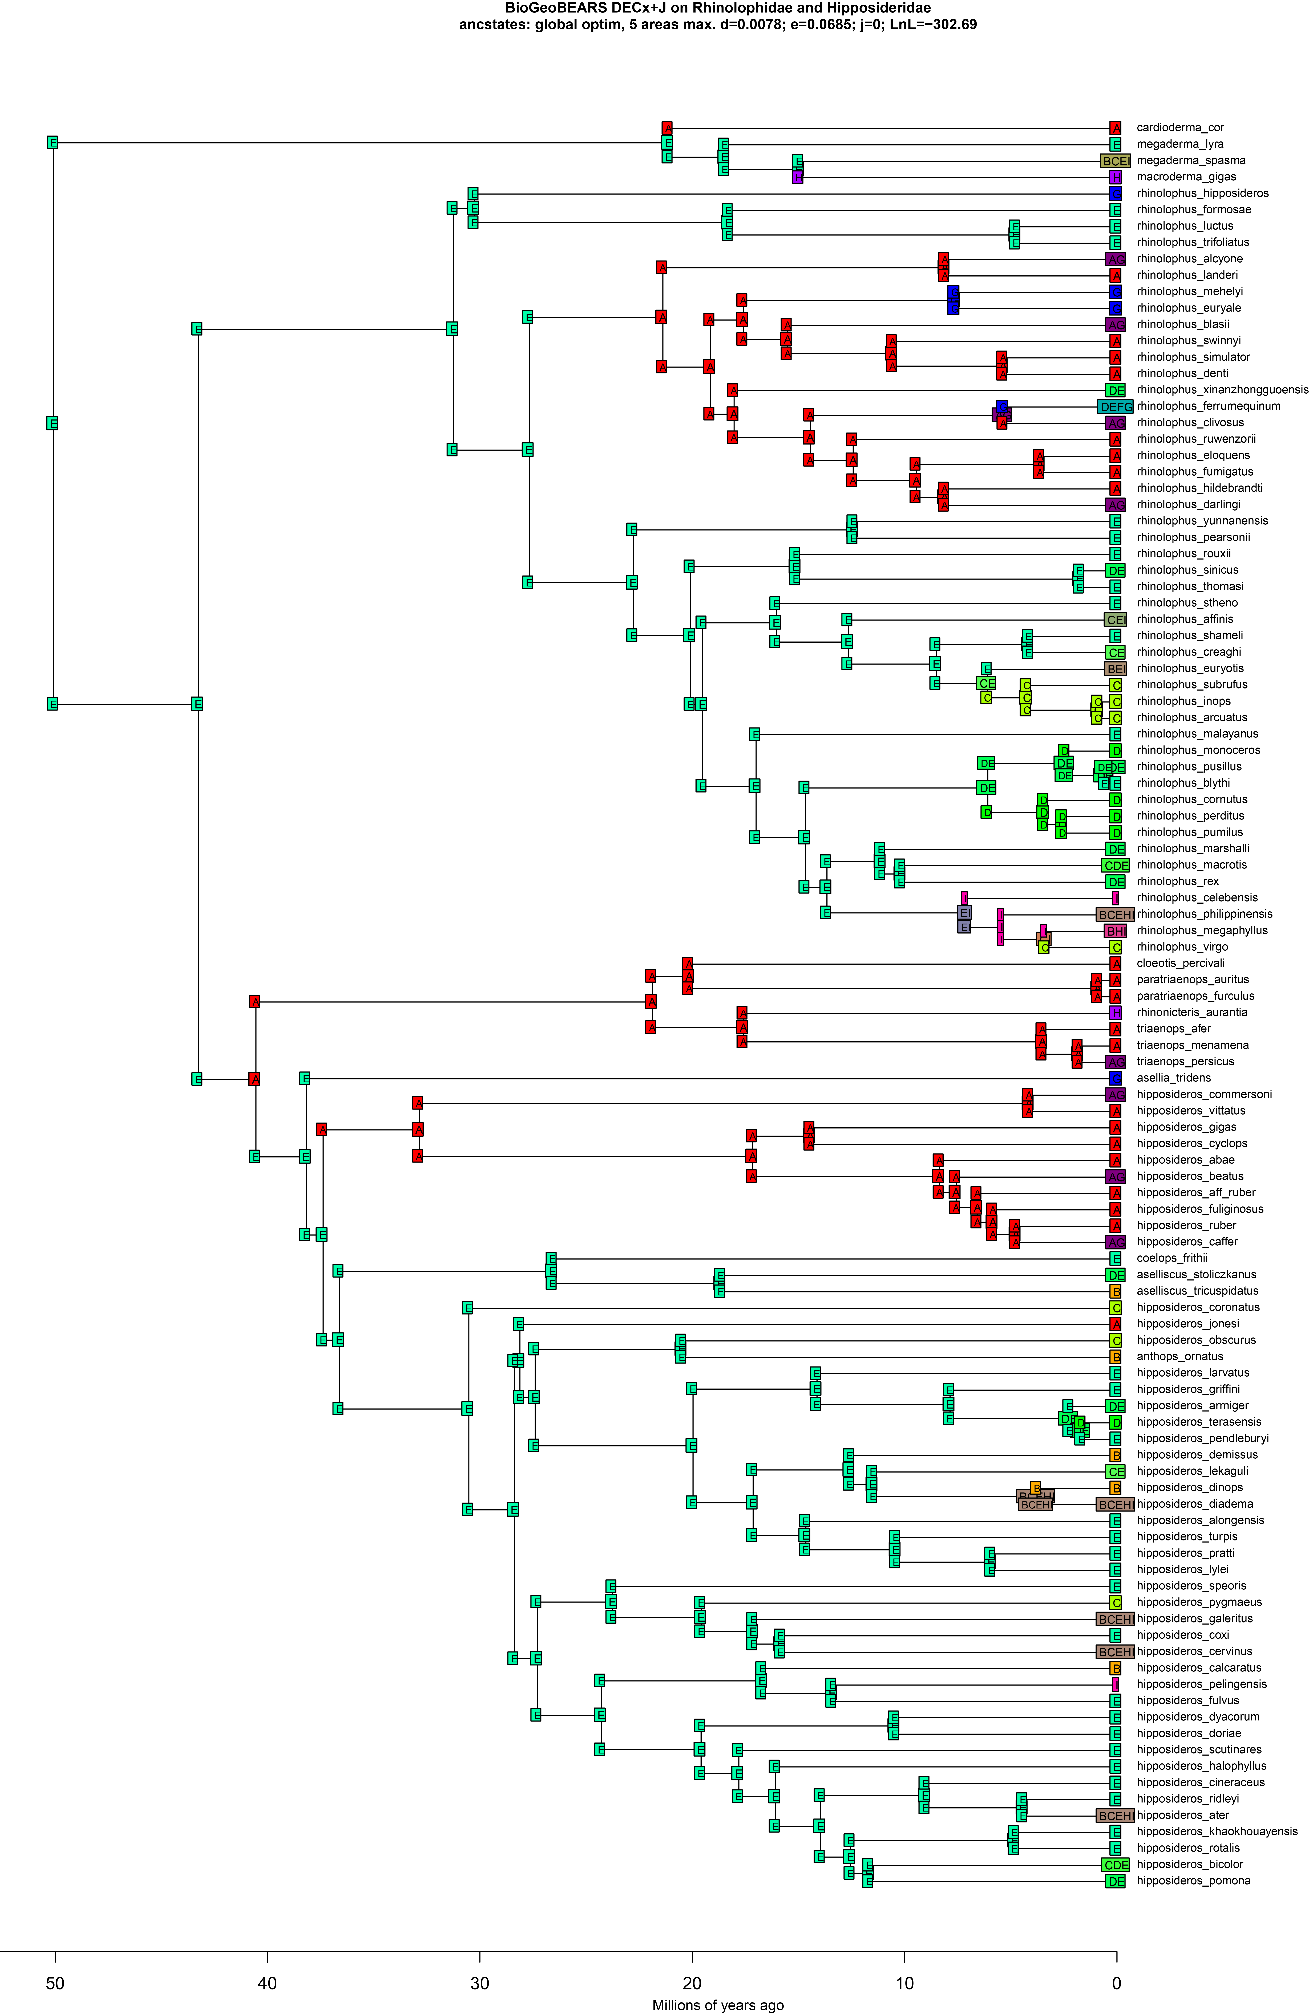


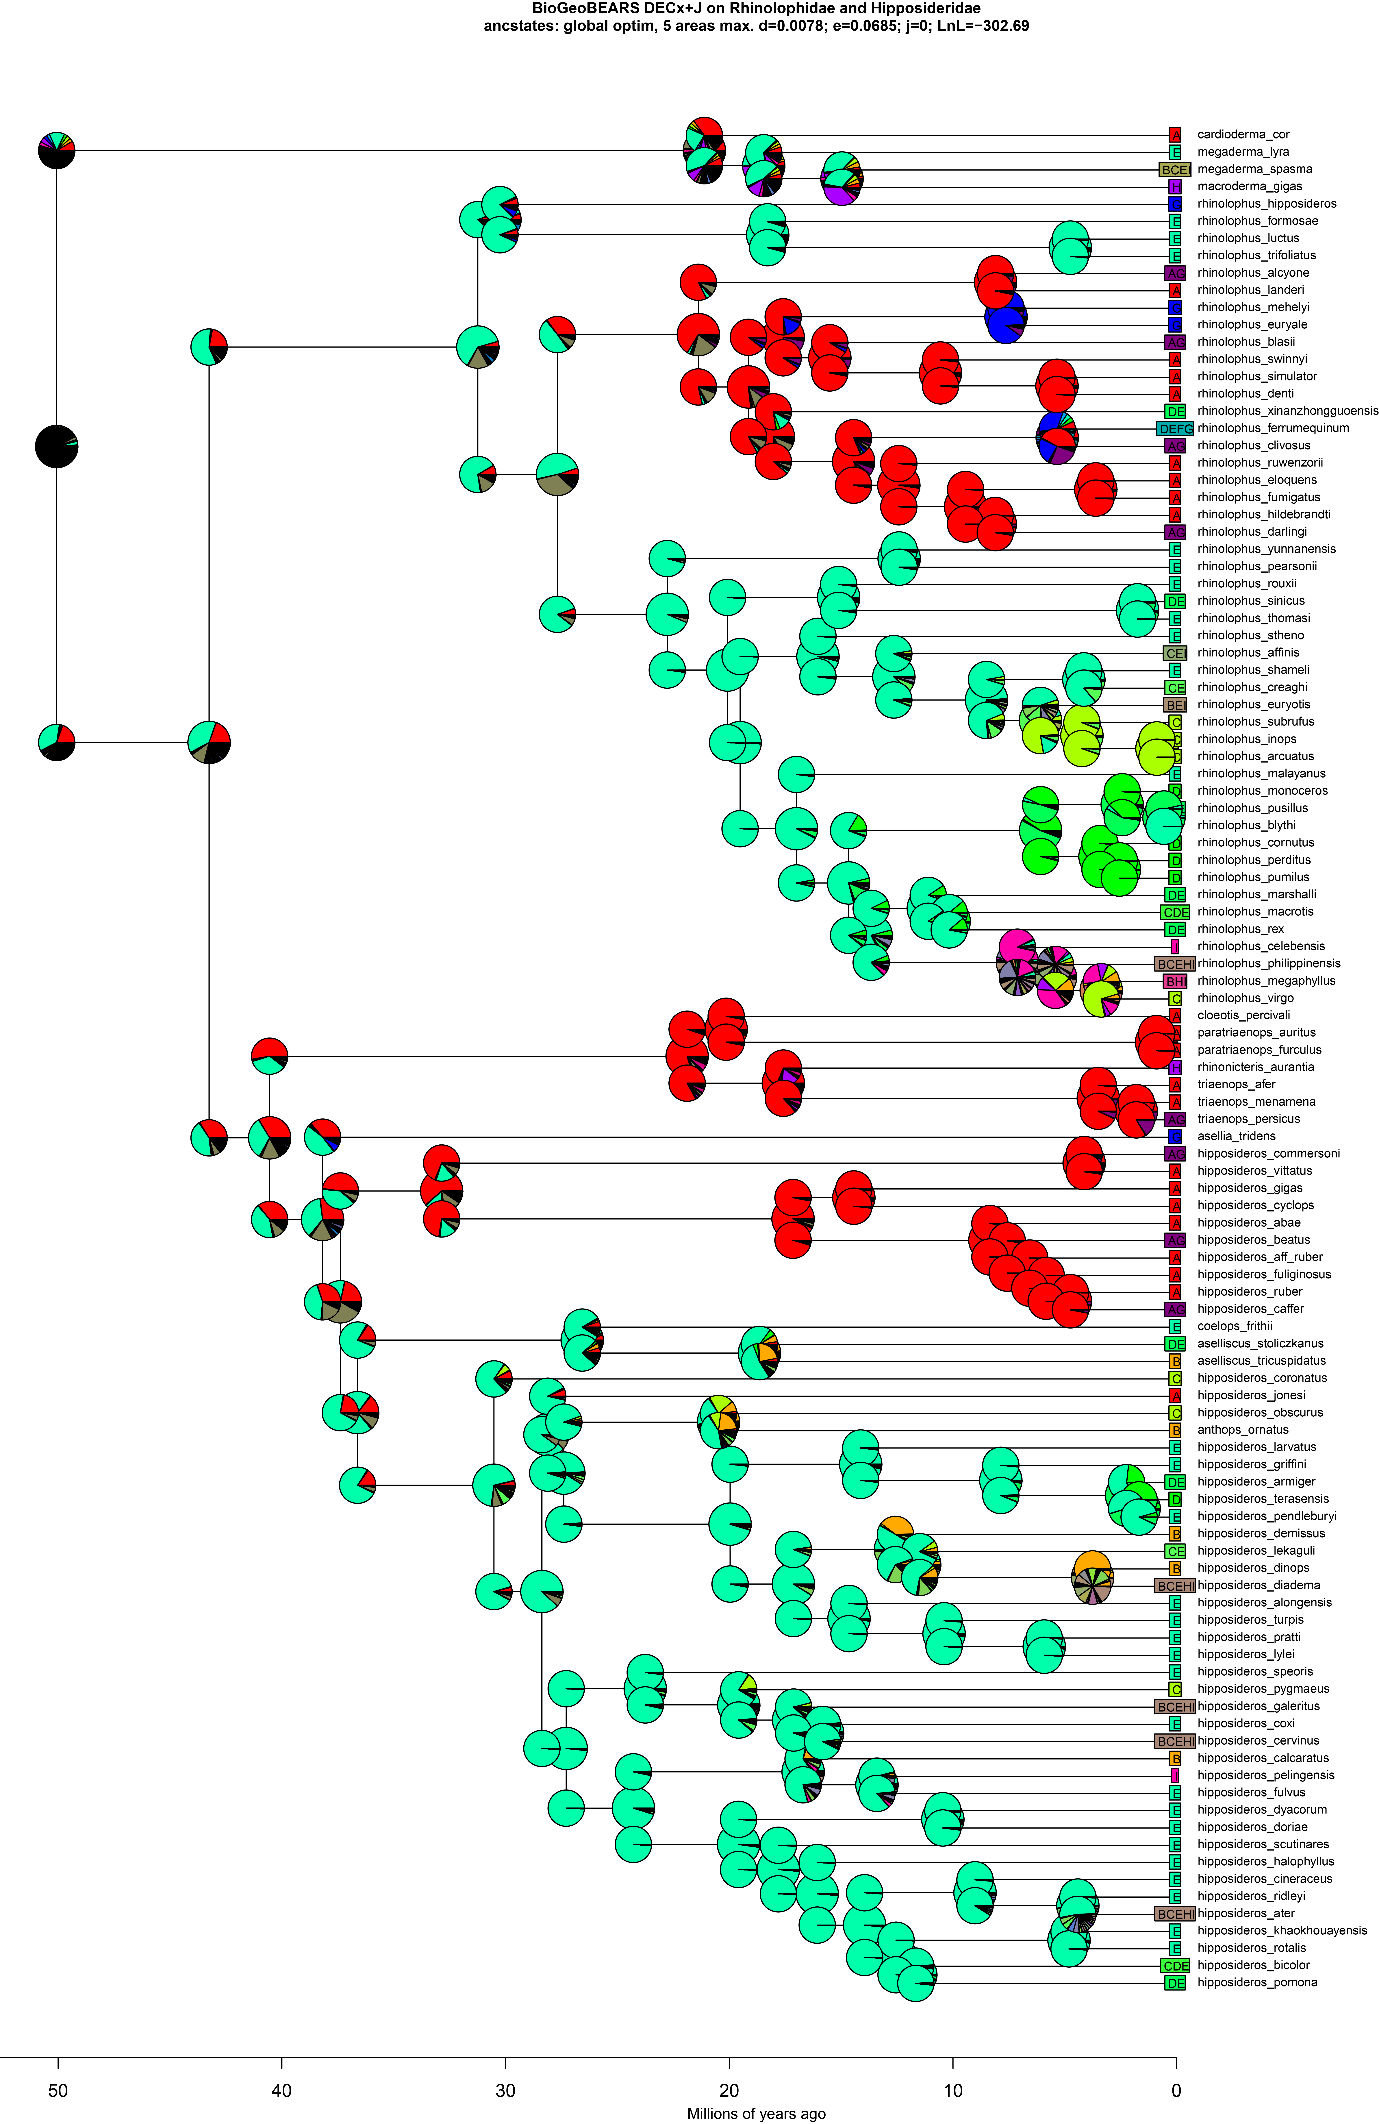


## **Supplementary Figure S6**


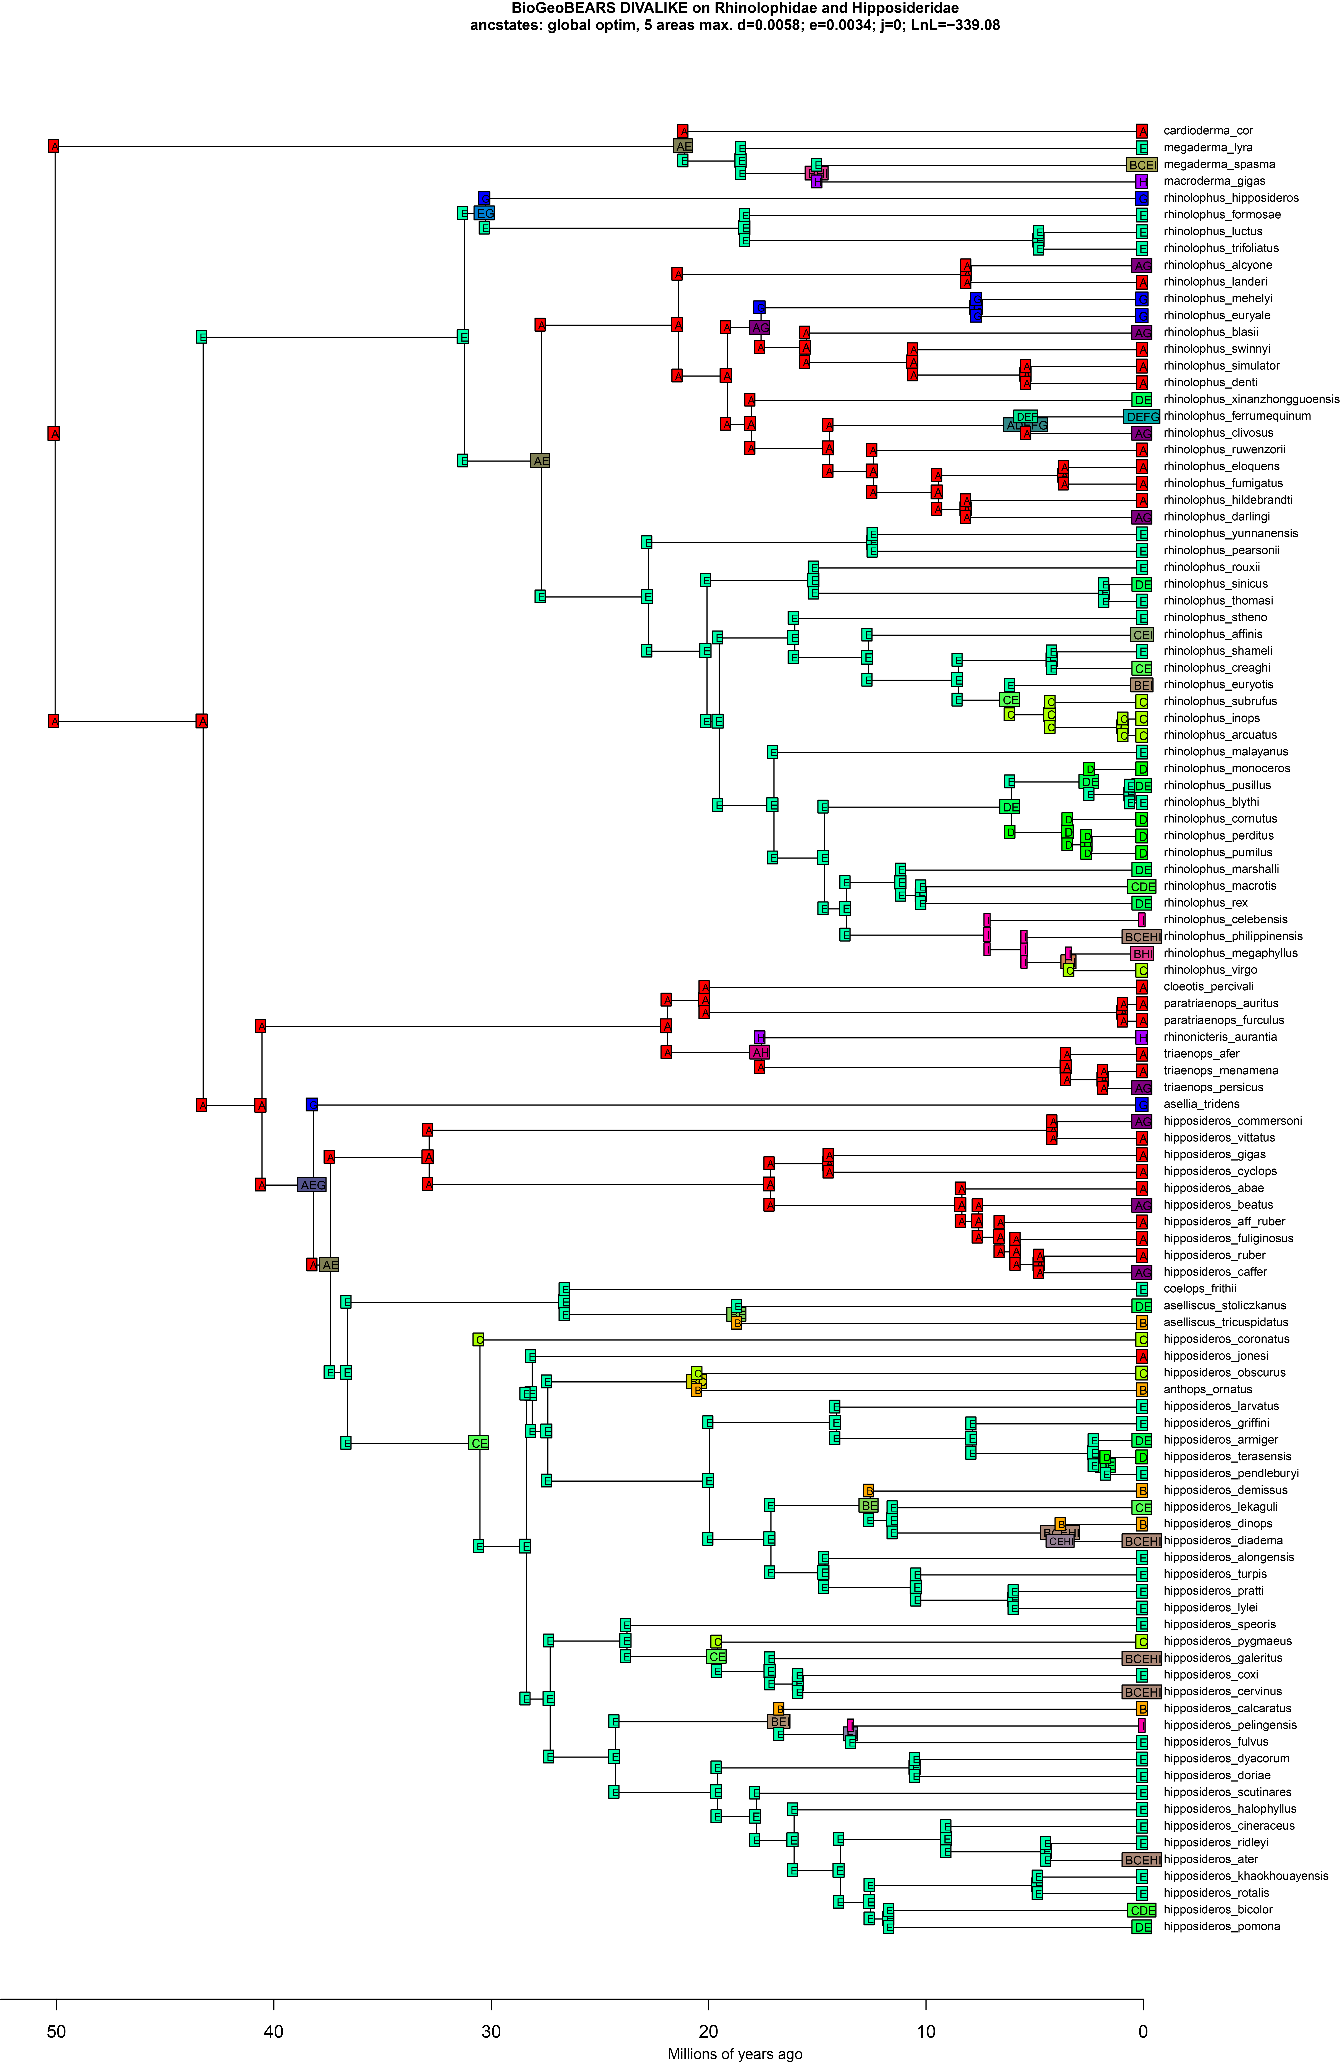


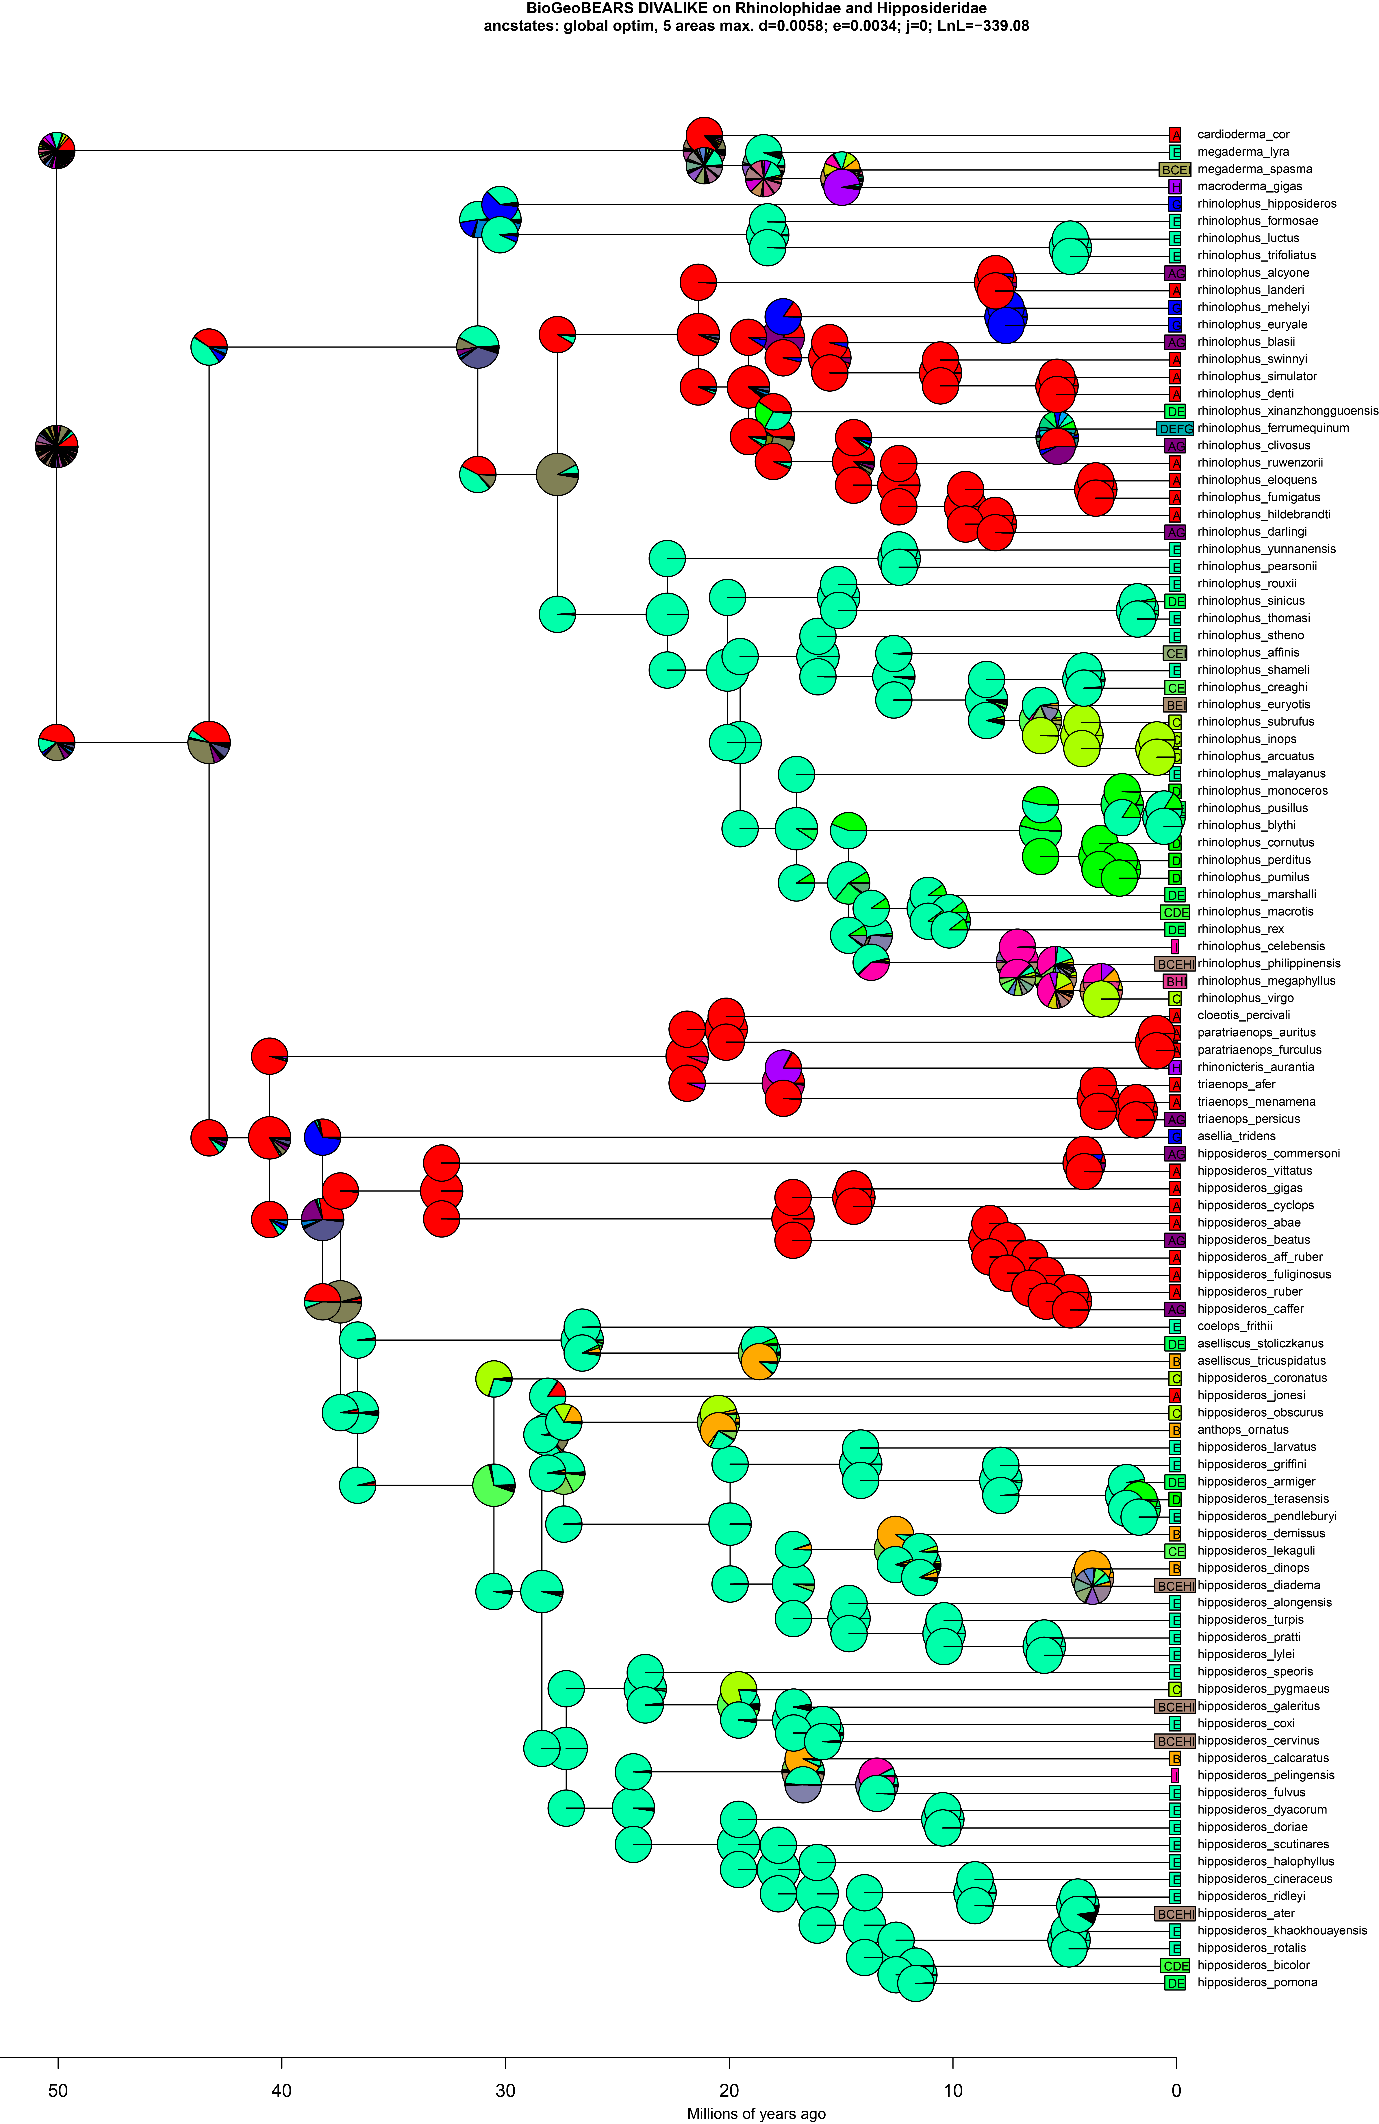


## **Supplementary Figure S7**


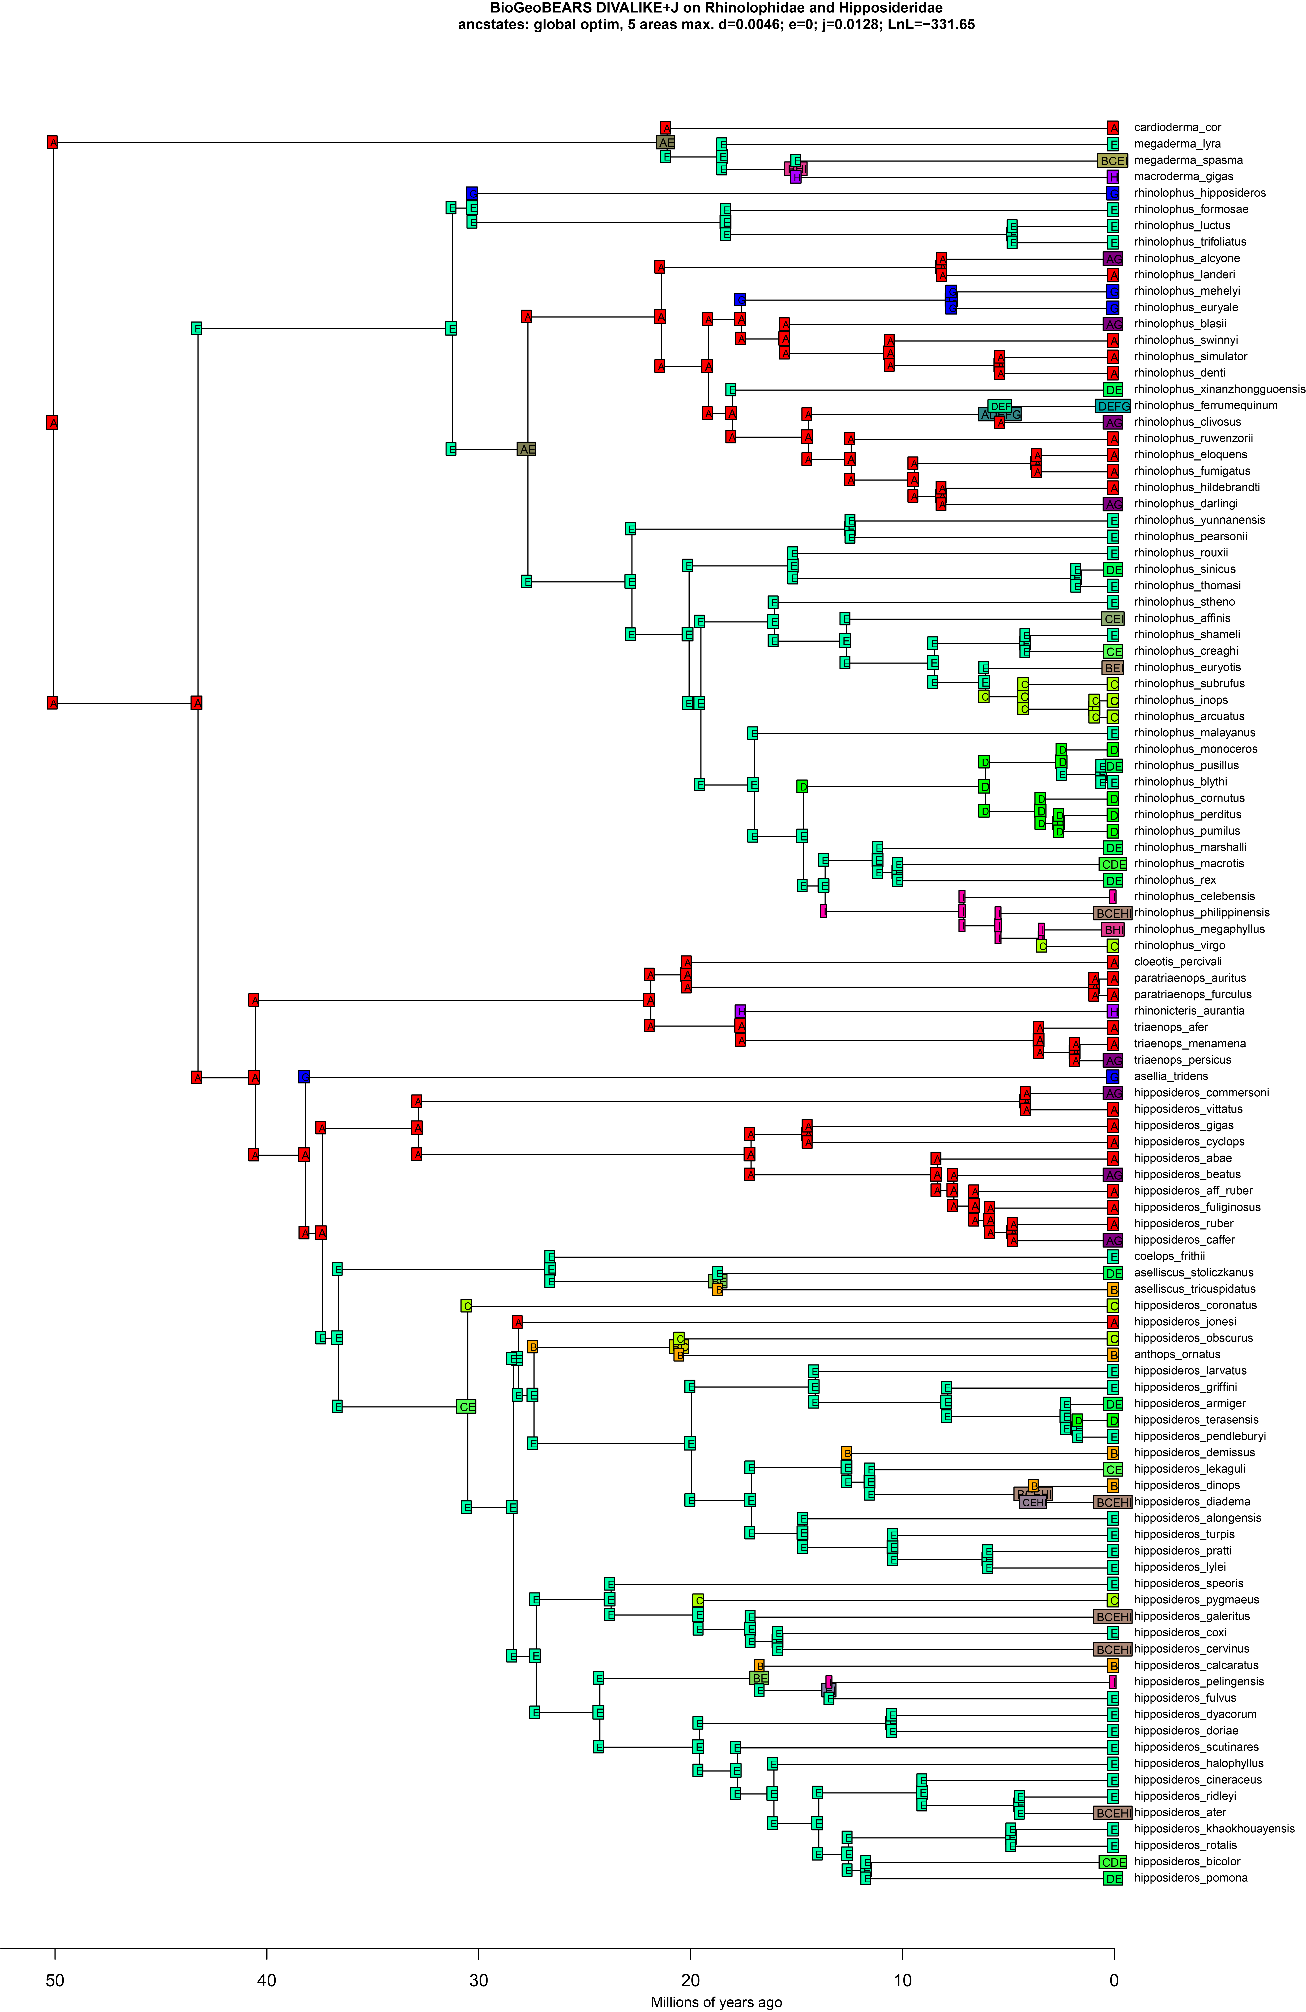


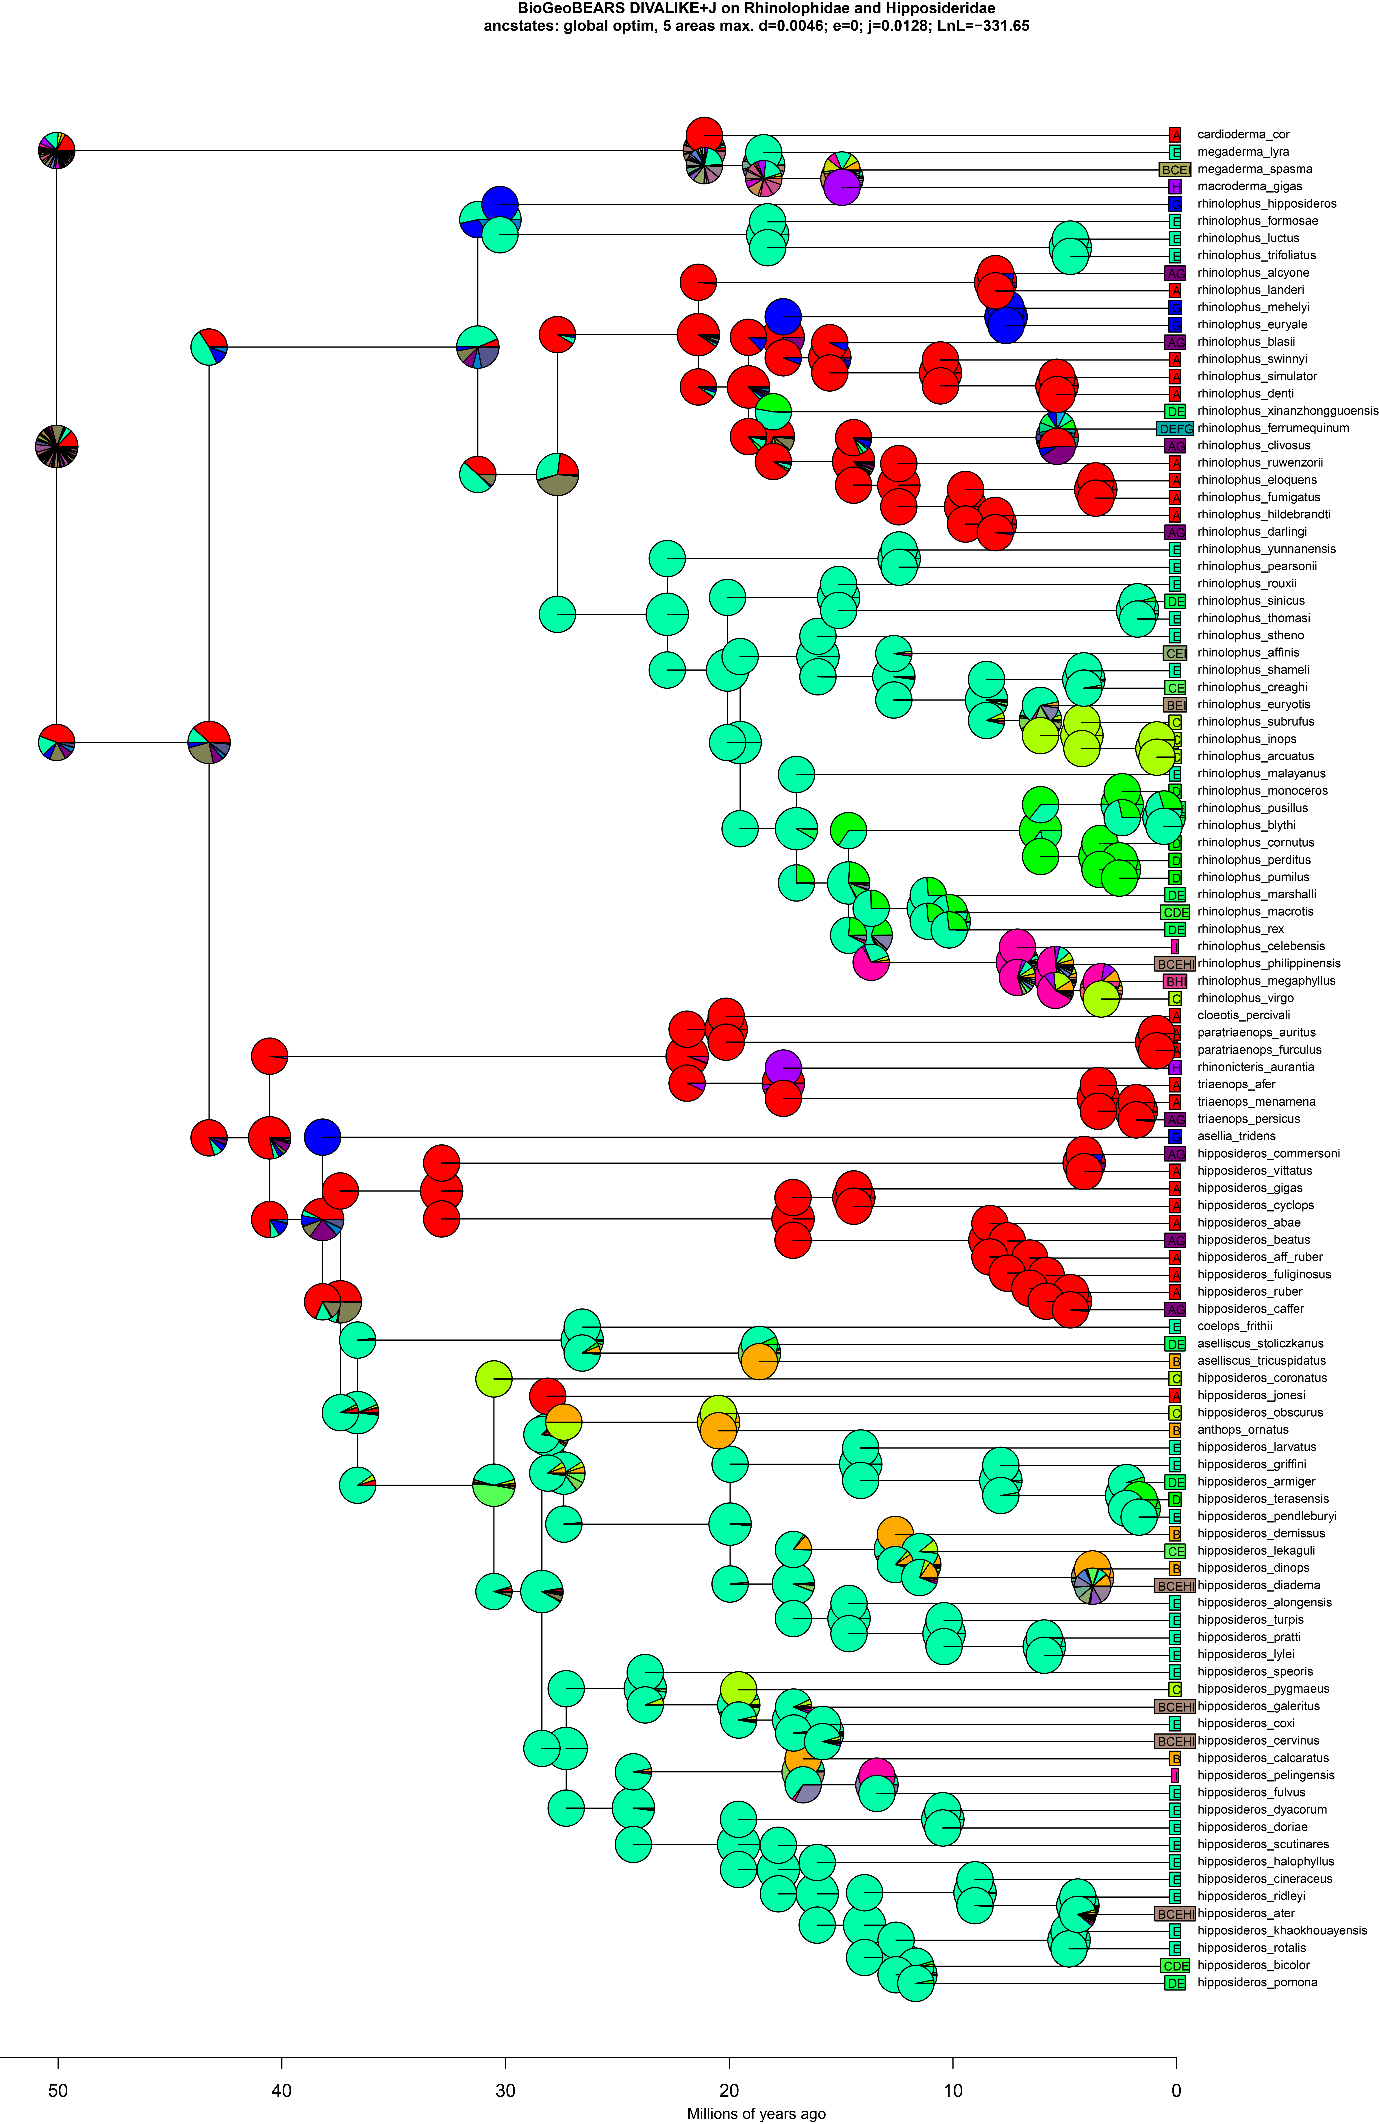


## **Supplementary Figure S8**


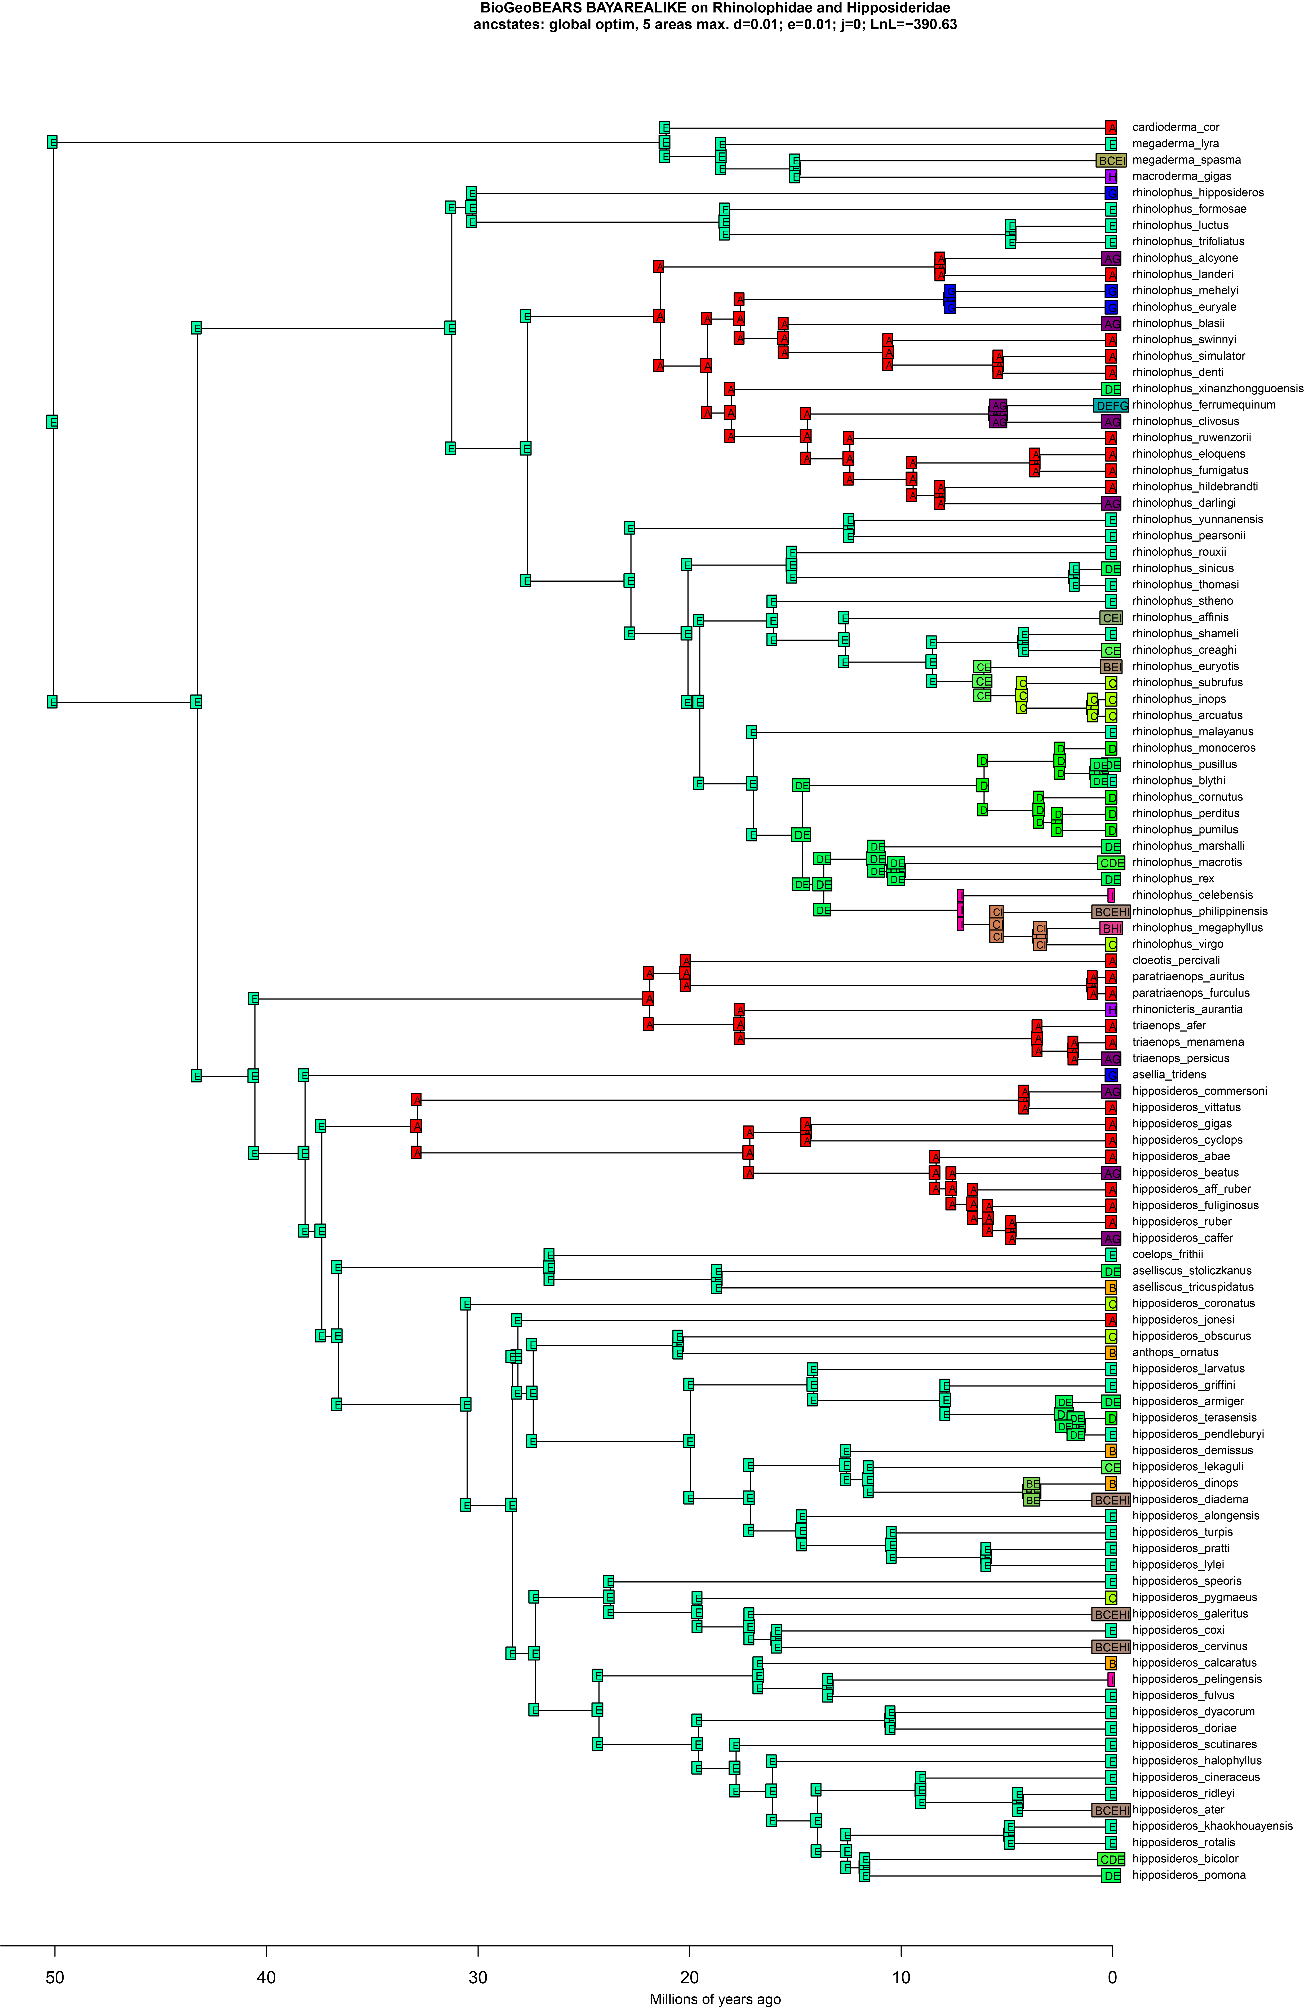


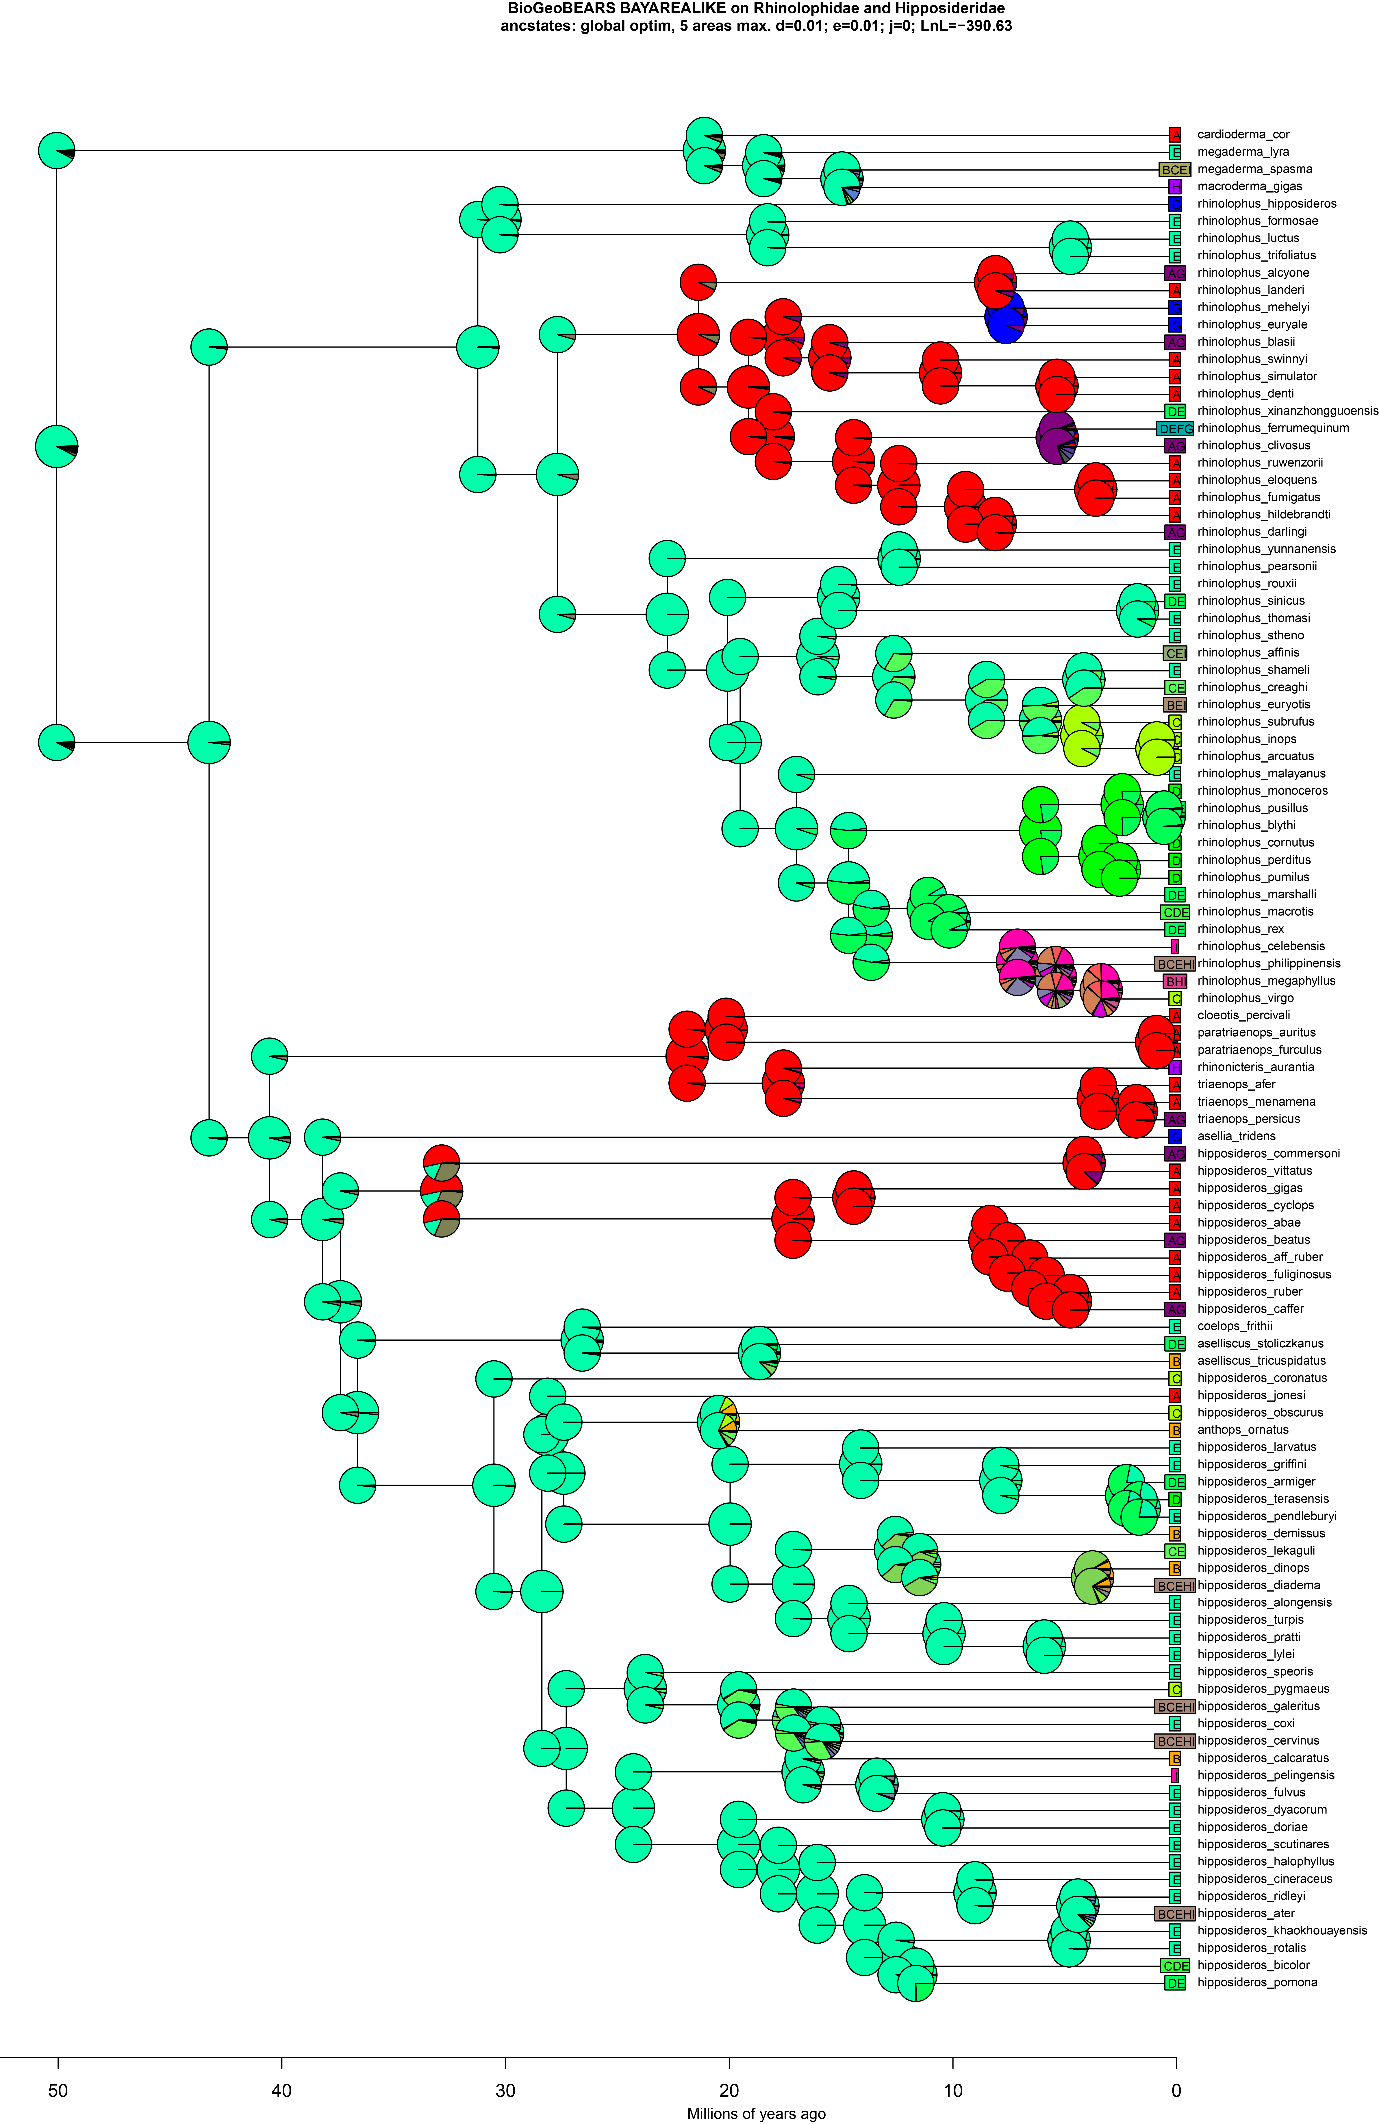


## **Supplementary Figure S9**


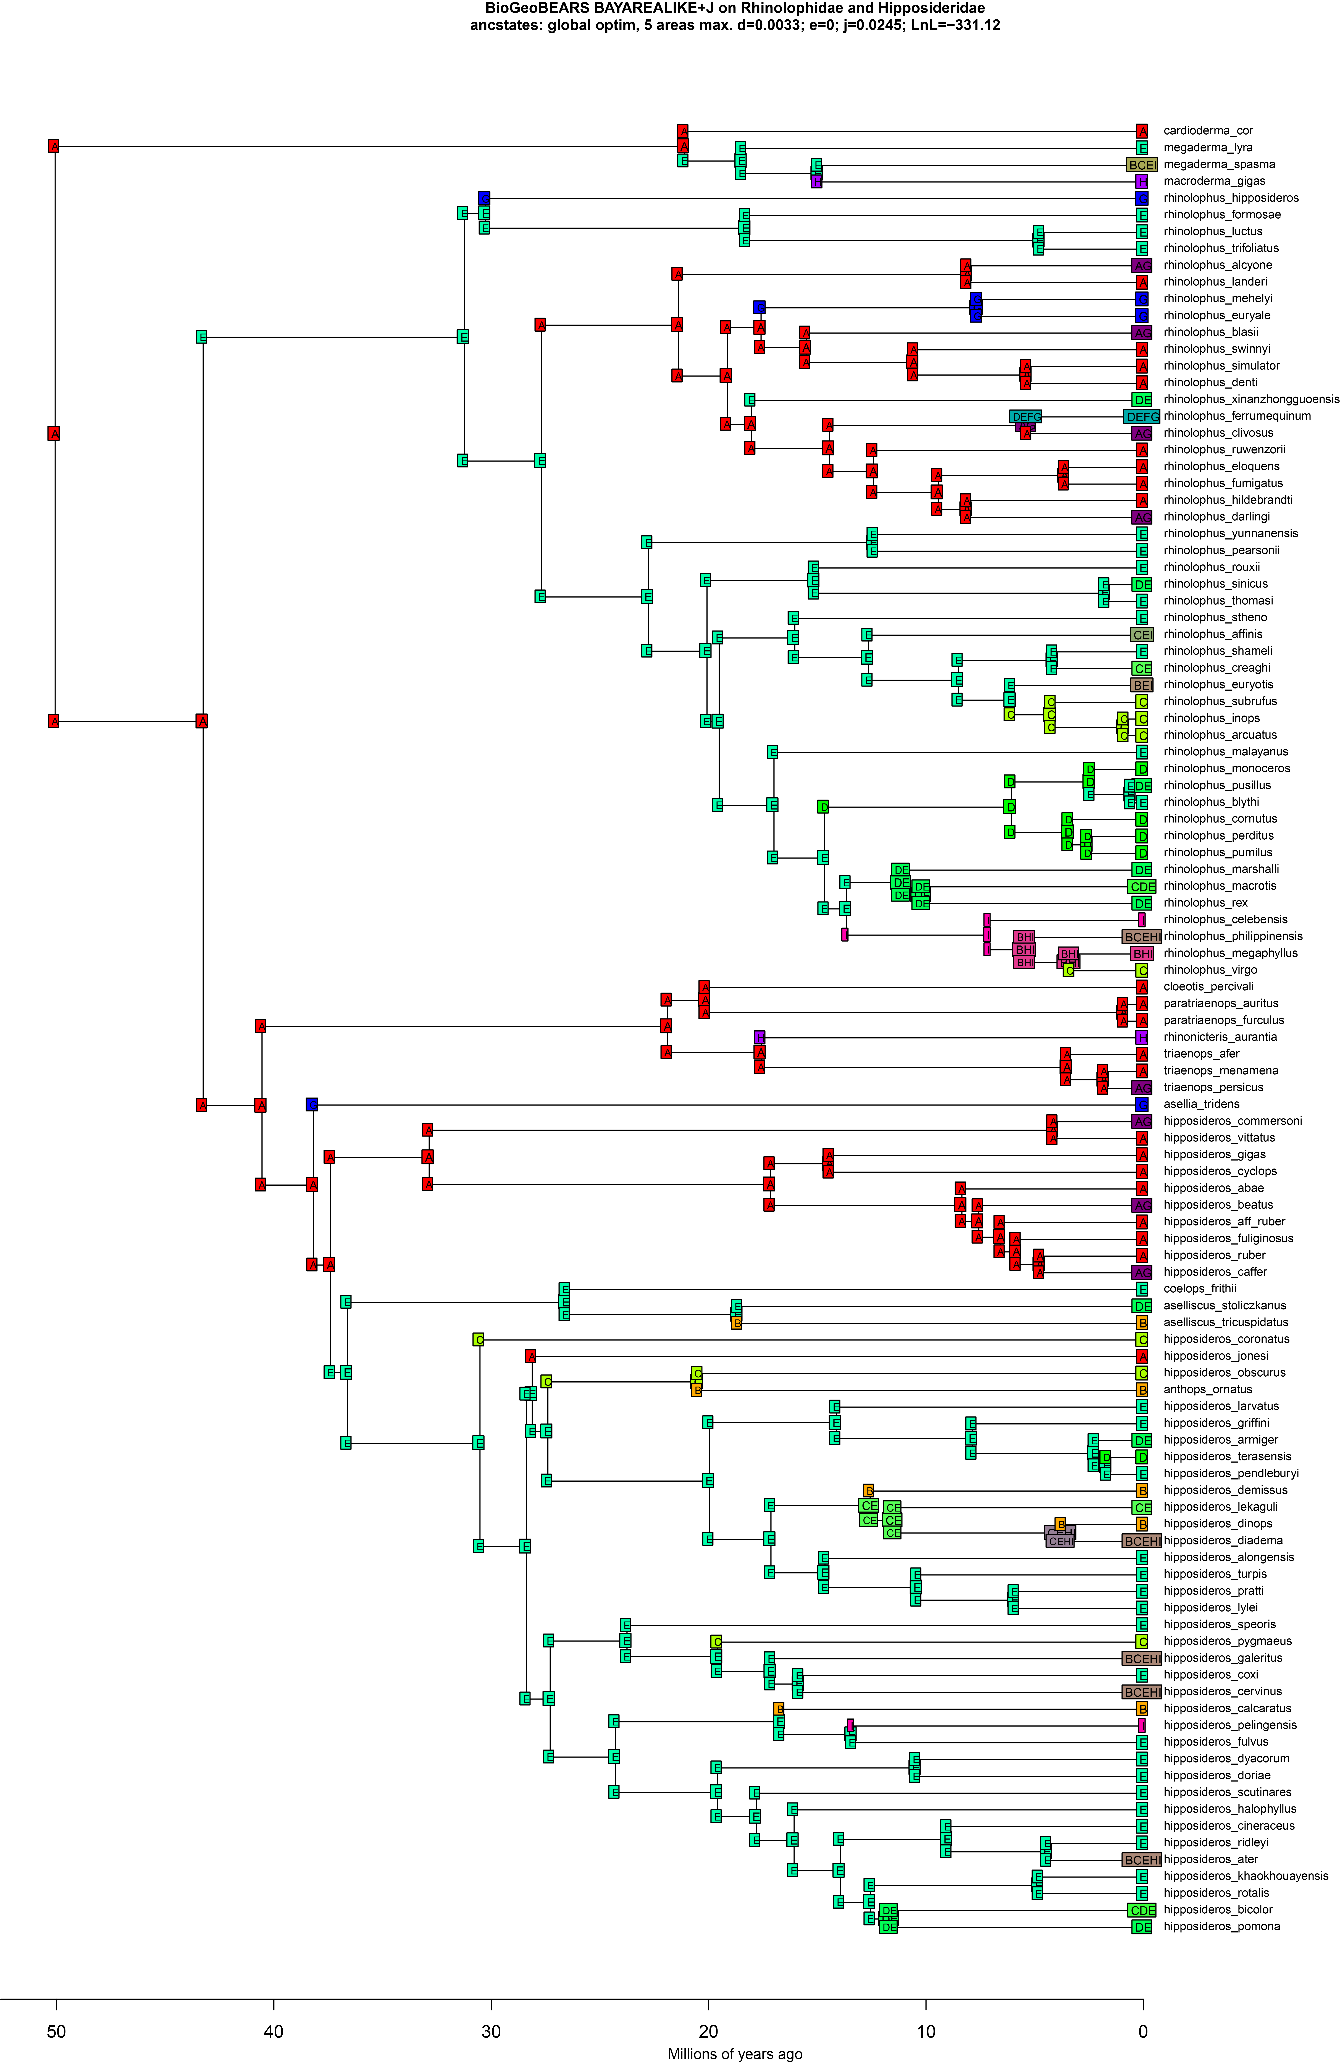


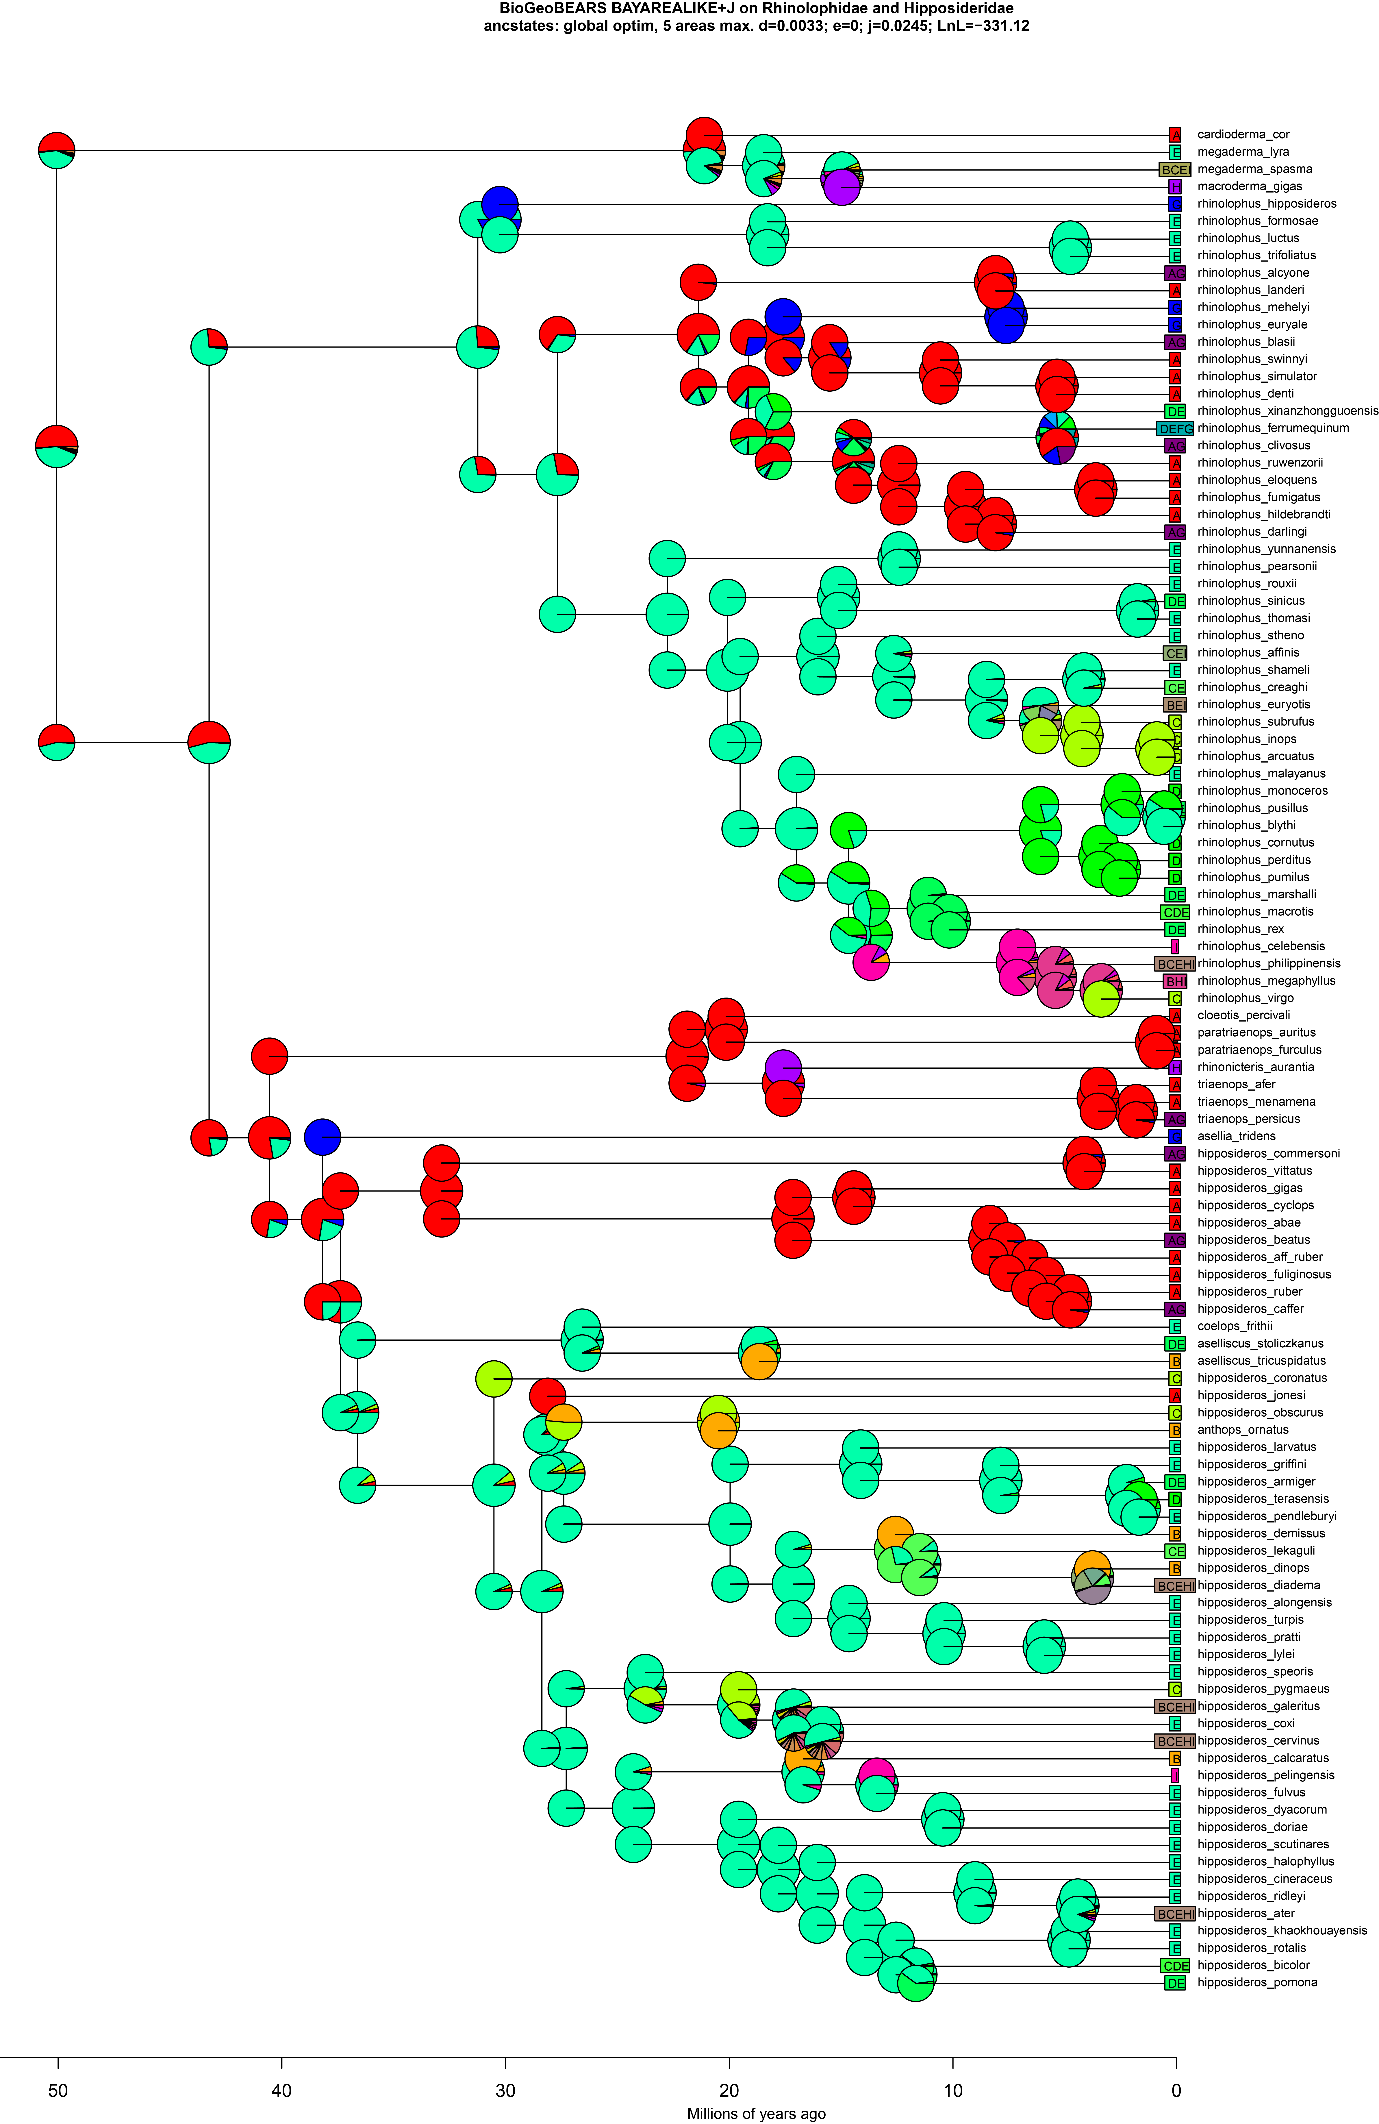

Supplement: Supplementary file 1 [file 9aabf743cf6ca537f1473d18.docx]
